# Supplementary material
Source: PubMed Central journal article supplement (PMC2802400)
Supplement: neu-11-6-803-s002.pdf [file neu-11-6-803-s002.pdf]

Table S1.

| Gene            | Forward primer            | Reverse Primer            | PCR product               | Size |
|-----------------|---------------------------|---------------------------|---------------------------|------|
| <i>MYCL1</i>    | TCTCTAAGCGCCAACCCTCAC     | GCACGTGGGTGTGTTGGTAAA     | chr1:40138923-40139038    | 115  |
| <i>DNAH7</i>    | GCAGAGCACTGTCTCCTCCTTGT   | GCCGGGAAATTCACCTCTAGAAA   | chr2:196094670-196094785  | 115  |
| <i>PPARGC1A</i> | CATGTTACCTGCGCAAGCTTCT    | TGACCTGCTTCCACCAAGA       | chr4:23406539-23406627    | 88   |
| <i>TERT</i>     | TTGCTGGGTTTCCACGATAGA     | AGAAGGAGTGTGAGCATTGTGTTA  | chr5:1310845-1310947      | 102  |
| <i>NPVF</i>     | AAATTGCCGTTGATGATCCATAG   | TCCCTAAAGCTGTGGCCTGTA     | chr7:25231147-25231250    | 103  |
| <i>ZNRF2</i>    | GGCTGCCCAGTAGAGAAAGTCTATT | TCTCCTCCTGACTCCTGGTACTAA  | chr7:30292207-30292327    | 120  |
| <i>LSM5</i>     | CCAAAGGACGGCGATTACCT      | TCAAAGTCGTCCCACCATCA      | chr7:32496439-32496550    | 111  |
| <i>HERPUD2</i>  | GGTGAGGAATGGGTGTTGCTATG   | TTGTCTCTCAGCTCCTGGGTATCA  | chr7:35208767-35208881    | 114  |
| <i>GRB10</i>    | TGGAACGCAAGGCTGAAGTA      | GCTGAATGGCCTCGCCTCTA      | chr7:50627212-50627332    | 120  |
| <i>BNC2</i>     | CCAACAAATTGGCCTGTGGTTAT   | GGGCACAAATGCCAAACAAA      | chr9:16407925-16408039    | 114  |
| <i>ADAMTSL1</i> | CTTGCCCGTACCGCCTTTAAT     | TCTGGGTTGGCTGCAAAGAG      | chr9:18464694-18464793    | 99   |
| <i>PTPLAD2</i>  | AGCAACCGTACTAAAGCAATTGTGA | TCTGCAGAAGGCTTGGCATAA     | chr9:21005577-21005668    | 91   |
| <i>PTPRE</i>    | AGCAGTGGAGGAGGCCAAGT      | GGCTGTGTACCTCCCTTGA       | chr10:129601126-129601239 | 113  |
| <i>RRAS2</i>    | TCCTGGCCGTTGGTAGCTAAA     | TCCTCCTTACCAGAACCAACA     | chr11:14257426-14257525   | 99   |
| <i>NAV3</i>     | TTGGGTCAAAGCCTGTGCATAC    | AGCATGGAGCTCTCTGTTTCAGTAA | chr12:76749416-76749527   | 111  |
| <i>TTC28</i>    | TGCAGGGACAGCTCCTTCAG      | GGCTCCTGGCAGATGACTT       | chr22:26708399-26708515   | 116  |

\*Conditions for q-PCR reaction were as follows, one cycle of 94°C for 2 min, 40 cycles of 94°C for 15 s, 55°C for 10 s and 60°C for 50 s.

Table S2.

| Tumor ID | Sex | Age | Group     | Localization           | Blood analyzed |
|----------|-----|-----|-----------|------------------------|----------------|
| G10      | m   | 58  | Primary   | temporal left          |                |
| G1143    | m   | 14  | Primary   | temporo-occipital left |                |
| G153     | m   | 49  | Primary   | no data                |                |
| G1596    | f   | 65  | Primary   | temporal left          |                |
| G174     | f   | 58  | Primary   | frontal right          |                |
| G1963    | m   | 67  | Primary   | parietal left          | Yes            |
| G20844   | m   | 43  | Primary   | temporal right         | Yes            |
| G20854   | f   | 42  | Primary   | occipital right        | Yes            |
| G20856   | m   | 45  | Primary   | no data                |                |
| G20890   | m   | 56  | Primary   | no data                | Yes            |
| G20940   | f   | 63  | Primary   | no data                |                |
| G20944   | m   | 59  | Primary   | no data                | Yes            |
| G20972   | m   | 44  | Primary   | no data                |                |
| G20990   | m   | 67  | Primary   | frontal lobe left      | Yes            |
| G21576   | f   | 47  | Primary   | no data                | Yes            |
| G21602   | m   | 58  | Primary   | no data                |                |
| G21612   | m   | 43  | Primary   | no data                |                |
| G21628   | m   | 61  | Primary   | no data                | Yes            |
| G21694   | f   | 46  | Secondary | no data                | Yes            |
| G21800   | m   | 51  | Primary   | no data                | Yes            |
| G21804   | m   | 75  | Primary   | no data                | Yes            |
| G21820   | f   | 55  | Primary   | no data                | Yes            |
| G21828   | f   | 62  | Primary   | no data                | Yes            |
| G21830   | f   | 63  | Primary   | no data                | Yes            |
| G21836   | m   | 46  | Primary   | no data                | Yes            |
| G21864   | f   | 41  | Primary   | no data                | Yes            |
| G22118   | m   | 34  | Secondary | no data                | Yes            |
| G22334   | m   | 76  | Primary   | no data                | Yes            |
| G22368   | m   | 49  | Primary   | no data                | Yes            |
| G22370   | f   | 65  | Primary   | no data                | Yes            |
| G22520   | m   | 74  | Primary   | occipital left         | Yes            |
| G22576   | f   | 67  | Primary   | temporal right         | Yes            |
| G22616   | m   | 70  | Primary   | occipital right        | Yes            |
| G22686   | m   | 72  | Primary   | no data                | Yes            |
| G22872   | m   | 49  | Primary   | parieto-occipital      | Yes            |
| G23120   | m   | 53  | Primary   | left temporal          |                |
| G23218   | f   | 71  | Primary   | no data                | Yes            |
| G23264   | m   | 63  | Primary   | right cerebellum       |                |
| G23282   | m   | 78  | Primary   | right fronto-temporal  |                |

|        |   |    |           |                           |     |
|--------|---|----|-----------|---------------------------|-----|
| G23304 | m | 59 | Primary   | no data                   | Yes |
| G23316 | f | 43 | Primary   | no data                   | Yes |
| G23480 | m | 40 | Primary   | no data                   | Yes |
| G23786 | m | 66 | Primary   | temporo-parietal right    |     |
| G23906 | f | 76 | Secondary | parietal left             |     |
| G24014 | m | 56 | Primary   | temporal right            |     |
| G24028 | m | 55 | Primary   | temporal right            |     |
| G24064 | m | 44 | Primary   | temporal left             | Yes |
| G24158 | m | 18 | Primary   | parieto-occipital right   | Yes |
| G24178 | m | 40 | Primary   | no data                   | Yes |
| G24454 | f | 64 | Primary   | no data                   | Yes |
| G24460 | m | 35 | Primary   | parietal right            | Yes |
| G24528 | f | 47 | Primary   | no data                   | Yes |
| G24596 | m | 42 | Primary   | frontal right             |     |
| G24702 | m | 59 | Primary   | frontal left              | Yes |
| G24930 | m | 45 | Primary   | no data                   | Yes |
| G25036 | m | 41 | Primary   | pontine left parasagittal | Yes |
| G251   | f | 52 | Primary   | parietal right            |     |
| G25108 | m | 70 | Primary   | parietal                  | Yes |
| G25488 | f | 59 | Primary   | temporal right            | Yes |
| G25496 | f | 58 | Primary   | frontal right             | Yes |
| G27006 | m | 69 | Primary   | no data                   |     |
| G27030 | f | 35 | Primary   | frontotemporal right      | Yes |
| G27040 | m | 66 | Primary   | no data                   | Yes |
| G27614 | f | 73 | Primary   | no data                   | Yes |
| G27622 | f | 72 | Primary   | temporal left             |     |
| G28882 | f | 22 | Secondary | no data                   | Yes |
| G29178 | m | 63 | Primary   | temporal right            |     |
| G29264 | m | 61 | Primary   | fronto-temporal right     |     |
| G29994 | m | 48 | Primary   | no data                   |     |
| G30196 | f | 64 | Primary   | fronto-temporal           |     |
| G30276 | m | 63 | Primary   | no data                   |     |
| G30296 | f | 41 | Primary   | no data                   |     |
| G30726 | f | 67 | Primary   | frontal right             |     |
| G30758 | m | 53 | Primary   | frontal left              |     |
| G40    | f | 67 | Primary   | frontal parietal left     |     |
| G48    | f | 60 | Primary   | frontal temporal left     |     |
| G50    | m | 51 | Primary   | temporal right            |     |
| G8     | m | 64 | Primary   | temporal frontal left     | Yes |

Table S3.

**Over represented GO terms in 3000 top ranked gained clones**

| Biological Process Results, GO id term                                                          | Nr genes | p-values  |
|-------------------------------------------------------------------------------------------------|----------|-----------|
| GO:0006355 regulation of transcription, DNA-dependent                                           | 471      | 4.44E-29  |
| GO:0032774 RNA biosynthetic process                                                             | 476      | 1.18E-27  |
| GO:0006351 transcription, DNA-dependent                                                         | 475      | 1.51E-27  |
| GO:0045449 regulation of transcription                                                          | 486      | 7.09E-27  |
| GO:0019219 regulation of nucleobase, nucleoside, nucleotide and nucleic acid metabolic process  | 493      | 6.2E-26   |
| GO:0006350 transcription                                                                        | 497      | 8.42E-26  |
| GO:0031323 regulation of cellular metabolic process                                             | 515      | 2.23E-23  |
| GO:0016070 RNA metabolic process                                                                | 540      | 7.49E-23  |
| GO:0019222 regulation of metabolic process                                                      | 527      | 1.46E-22  |
| GO:0006139 nucleobase, nucleoside, nucleotide and nucleic acid metabolic process                | 622      | 2E-13     |
| GO:0050794 regulation of cellular process                                                       | 679      | 4.24E-12  |
| GO:0050789 regulation of biological process                                                     | 740      | 2.1E-11   |
| GO:0065007 biological regulation                                                                | 771      | 1.84E-10  |
| GO:0043283 biopolymer metabolic process                                                         | 767      | 5.92E-09  |
| GO:0043170 macromolecule metabolic process                                                      | 955      | 0.0000191 |
| GO:0009988 cell-cell recognition                                                                | 7        | 0.00156   |
| GO:0044237 cellular metabolic process                                                           | 1084     | 0.00194   |
| GO:0044238 primary metabolic process                                                            | 1053     | 0.00367   |
| GO:0007224 smoothened signaling pathway                                                         | 7        | 0.0044    |
| GO:0007339 binding of sperm to zona pellucida                                                   | 5        | 0.00655   |
| GO:0030509 BMP signaling pathway                                                                | 8        | 0.00732   |
| GO:0000375 RNA splicing, via transesterification reactions                                      | 18       | 0.00868   |
| GO:0000377 RNA splicing, via transesterification reactions with bulged adenosine as nucleophile | 18       | 0.00868   |
| GO:0000398 nuclear mRNA splicing, via spliceosome                                               | 18       | 0.00868   |
| GO:0040017 positive regulation of locomotion                                                    | 6        | 0.00894   |
| GO:0051272 positive regulation of cell motility                                                 | 6        | 0.00894   |
| GO:0035036 sperm-egg recognition                                                                | 5        | 0.0114    |
| GO:0051101 regulation of DNA binding                                                            | 5        | 0.0114    |
| GO:0042742 defense response to bacterium                                                        | 19       | 0.0122    |
| GO:0030099 myeloid cell differentiation                                                         | 20       | 0.0123    |
| GO:0008588 release of cytoplasmic sequestered NF-kappaB                                         | 3        | 0.0132    |
| GO:0043388 positive regulation of DNA binding                                                   | 3        | 0.0132    |
| GO:0007202 phospholipase C activation                                                           | 6        | 0.0136    |
| GO:0008152 metabolic process                                                                    | 1137     | 0.0141    |
| GO:0051704 multi-organism process                                                               | 27       | 0.0147    |
| GO:0008272 sulfate transport                                                                    | 5        | 0.0183    |
| GO:0030516 regulation of axon extension                                                         | 5        | 0.0183    |
| GO:0051047 positive regulation of secretion                                                     | 7        | 0.0195    |
| GO:0048675 axon extension                                                                       | 6        | 0.0198    |
| GO:0009617 response to bacterium                                                                | 20       | 0.0213    |
| GO:0045785 positive regulation of cell adhesion                                                 | 4        | 0.024     |
| GO:0006598 polyamine catabolic process                                                          | 2        | 0.0241    |
| GO:0006900 membrane budding                                                                     | 2        | 0.0241    |
| GO:0006901 vesicle coating                                                                      | 2        | 0.0241    |

|                                                                |    |        |
|----------------------------------------------------------------|----|--------|
| GO:0007402 ganglion mother cell fate determination             | 2  | 0.0241 |
| GO:0008612 hypusine biosynthetic process from peptidyl-lysine  | 2  | 0.0241 |
| GO:0015810 aspartate transport                                 | 2  | 0.0241 |
| GO:0015979 photosynthesis                                      | 2  | 0.0241 |
| GO:0046515 hypusine biosynthetic process                       | 2  | 0.0241 |
| GO:0046516 hypusine metabolic process                          | 2  | 0.0241 |
| GO:0046685 response to arsenic                                 | 2  | 0.0241 |
| GO:0046794 virion transport                                    | 2  | 0.0241 |
| GO:0046795 intracellular virion transport                      | 2  | 0.0241 |
| GO:0046800 enhancement of virulence                            | 2  | 0.0241 |
| GO:0046968 peptide antigen transport                           | 2  | 0.0241 |
| GO:0048012 hepatocyte growth factor receptor signaling pathway | 2  | 0.0241 |
| GO:0048268 clathrin cage assembly                              | 2  | 0.0241 |
| GO:0051403 stress-activated MAPK cascade                       | 2  | 0.0241 |
| GO:0051450 myoblast proliferation                              | 2  | 0.0241 |
| GO:0048609 reproductive process in a multicellular organism    | 24 | 0.0248 |

| Cellular Component Results, GO id term                | Nr genes | p-values  |
|-------------------------------------------------------|----------|-----------|
| GO:0005634 nucleus                                    | 697      | 2.23E-10  |
| GO:0043231 intracellular membrane-bound organelle     | 941      | 0.0000224 |
| GO:0043227 membrane-bound organelle                   | 941      | 0.0000249 |
| GO:0043229 intracellular organelle                    | 1036     | 0.000906  |
| GO:0043226 organelle                                  | 1036     | 0.000924  |
| GO:0030122 AP-2 adaptor complex                       | 3        | 0.0132    |
| GO:0030128 clathrin coat of endocytic vesicle         | 3        | 0.0132    |
| GO:0030669 clathrin-coated endocytic vesicle membrane | 3        | 0.0132    |
| GO:0043189 H4/H2A histone acetyltransferase complex   | 4        | 0.0136    |
| GO:0005622 intracellular                              | 1230     | 0.0208    |
| GO:0009579 thylakoid                                  | 2        | 0.0241    |
| GO:0009842 cyanelle                                   | 2        | 0.0241    |
| GO:0009843 cyanelle thylakoid                         | 2        | 0.0241    |
| GO:0030075 plasma membrane thylakoid                  | 2        | 0.0241    |
| GO:0030076 light-harvesting complex                   | 2        | 0.0241    |
| GO:0030089 phycobilisome                              | 2        | 0.0241    |
| GO:0042716 chromatophore                              | 2        | 0.0241    |
| GO:0044436 thylakoid part                             | 2        | 0.0241    |

| Molecular Function Results, GO id term                                                                                                                                                                 | Nr genes | p-values  |
|--------------------------------------------------------------------------------------------------------------------------------------------------------------------------------------------------------|----------|-----------|
| GO:0008270 zinc ion binding                                                                                                                                                                            | 449      | 7.14E-22  |
| GO:0003676 nucleic acid binding                                                                                                                                                                        | 601      | 7.63E-20  |
| GO:0003677 DNA binding                                                                                                                                                                                 | 420      | 7.79E-18  |
| GO:0046914 transition metal ion binding                                                                                                                                                                | 496      | 9.9E-17   |
| GO:0043169 cation binding                                                                                                                                                                              | 610      | 5.8E-10   |
| GO:0046872 metal ion binding                                                                                                                                                                           | 636      | 2.11E-08  |
| GO:0043167 ion binding                                                                                                                                                                                 | 642      | 8.64E-08  |
| GO:0016712 oxidoreductase activity, acting on paired donors, with incorporation or reduction of molecular oxygen, reduced flavin or flavoprotein as one donor, and incorporation of one atom of oxygen | 14       | 0.000033  |
| GO:0050381 unspecific monooxygenase activity                                                                                                                                                           | 12       | 0.0000785 |
| GO:0005529 sugar binding                                                                                                                                                                               | 40       | 0.00144   |
| GO:0030528 transcription regulator activity                                                                                                                                                            | 222      | 0.00213   |

|                                                                                     |      |         |
|-------------------------------------------------------------------------------------|------|---------|
| GO:0046790 virion binding                                                           | 4    | 0.00248 |
| GO:0004497 monooxygenase activity                                                   | 25   | 0.00271 |
| GO:0004064 arylesterase activity                                                    | 3    | 0.00367 |
| GO:0004293 tissue kallikrein activity                                               | 3    | 0.00367 |
| GO:0017060 3-galactosyl-N-acetylglucosaminide 4-alpha-L-fucosyltransferase activity | 3    | 0.00367 |
| GO:0042607 exogenous peptide antigen binding                                        | 3    | 0.00367 |
| GO:0003700 transcription factor activity                                            | 154  | 0.00379 |
| GO:0008271 sulfate porter activity                                                  | 5    | 0.00637 |
| GO:0015116 sulfate transporter activity                                             | 5    | 0.00637 |
| GO:0004982 N-formyl peptide receptor activity                                       | 4    | 0.00653 |
| GO:0003823 antigen binding                                                          | 12   | 0.00765 |
| GO:0042605 peptide antigen binding                                                  | 6    | 0.00866 |
| GO:0008017 microtubule binding                                                      | 12   | 0.012   |
| GO:0008417 fucosyltransferase activity                                              | 6    | 0.0132  |
| GO:0020037 heme binding                                                             | 25   | 0.0142  |
| GO:0046906 tetrapyrrole binding                                                     | 25   | 0.0142  |
| GO:0030246 carbohydrate binding                                                     | 53   | 0.0156  |
| GO:0000149 SNARE binding                                                            | 7    | 0.0189  |
| GO:0008236 serine-type peptidase activity                                           | 34   | 0.0217  |
| GO:0005488 binding                                                                  | 1547 | 0.0221  |
| GO:0015103 inorganic anion transporter activity                                     | 10   | 0.0233  |
| GO:0003958 NADPH-hemoprotein reductase activity                                     | 2    | 0.0238  |
| GO:0004063 arylalkylphosphatase activity                                            | 2    | 0.0238  |
| GO:0004074 biliverdin reductase activity                                            | 2    | 0.0238  |
| GO:0005046 KDEL sequence binding                                                    | 2    | 0.0238  |
| GO:0005185 neurohypophyseal hormone activity                                        | 2    | 0.0238  |
| GO:0015111 iodide transporter activity                                              | 2    | 0.0238  |
| GO:0032396 inhibitory MHC class I receptor activity                                 | 2    | 0.0238  |
| GO:0043237 laminin-1 binding                                                        | 2    | 0.0238  |
| GO:0050051 leukotriene-B4 20-monooxygenase activity                                 | 2    | 0.0238  |
| GO:0050321 tau-protein kinase activity                                              | 2    | 0.0238  |

### Over represented GO terms in 3000 top ranked deleted clones

| Biological Process Results, GO id term           | Nr genes | p-values  |
|--------------------------------------------------|----------|-----------|
| GO:0009615 response to virus                     | 21       | 0.000042  |
| GO:0009056 catabolic process                     | 89       | 0.0000515 |
| GO:0006629 lipid metabolic process               | 89       | 0.000648  |
| GO:0044255 cellular lipid metabolic process      | 74       | 0.00105   |
| GO:0016042 lipid catabolic process               | 19       | 0.00117   |
| GO:0043450 alkene biosynthetic process           | 7        | 0.00137   |
| GO:0009241 polyisoprenoid biosynthetic process   | 3        | 0.004     |
| GO:0016109 tetraterpenoid biosynthetic process   | 3        | 0.004     |
| GO:0016114 terpenoid biosynthetic process        | 3        | 0.004     |
| GO:0016117 carotenoid biosynthetic process       | 3        | 0.004     |
| GO:0046246 terpene biosynthetic process          | 3        | 0.004     |
| GO:0007049 cell cycle                            | 100      | 0.00423   |
| GO:0006996 organelle organization and biogenesis | 120      | 0.00442   |
| GO:0008632 apoptotic program                     | 14       | 0.00484   |
| GO:0022402 cell cycle process                    | 87       | 0.00644   |

|                                                                  |    |         |
|------------------------------------------------------------------|----|---------|
| GO:0044248 cellular catabolic process                            | 67 | 0.00727 |
| GO:0006643 membrane lipid metabolic process                      | 27 | 0.00744 |
| GO:0009057 macromolecule catabolic process                       | 50 | 0.00833 |
| GO:0005996 monosaccharide metabolic process                      | 24 | 0.00853 |
| GO:0007051 spindle organization and biogenesis                   | 7  | 0.0086  |
| GO:0043449 alkene metabolic process                              | 7  | 0.0086  |
| GO:0016108 tetraterpenoid metabolic process                      | 3  | 0.00923 |
| GO:0016116 carotenoid metabolic process                          | 3  | 0.00923 |
| GO:0050828 regulation of liquid surface tension                  | 3  | 0.00923 |
| GO:0008285 negative regulation of cell proliferation             | 31 | 0.00954 |
| GO:0046365 monosaccharide catabolic process                      | 14 | 0.00963 |
| GO:0007052 mitotic spindle organization and biogenesis           | 5  | 0.0103  |
| GO:0009065 glutamine family amino acid catabolic process         | 5  | 0.0103  |
| GO:0006780 uroporphyrinogen III biosynthetic process             | 2  | 0.0105  |
| GO:0009439 cyanate metabolic process                             | 2  | 0.0105  |
| GO:0009440 cyanate catabolic process                             | 2  | 0.0105  |
| GO:0019754 one-carbon compound catabolic process                 | 2  | 0.0105  |
| GO:0019858 cytosine metabolic process                            | 2  | 0.0105  |
| GO:0046502 uroporphyrinogen III metabolic process                | 2  | 0.0105  |
| GO:0019748 secondary metabolic process                           | 9  | 0.0109  |
| GO:0007010 cytoskeleton organization and biogenesis              | 59 | 0.011   |
| GO:0051260 protein homooligomerization                           | 8  | 0.0112  |
| GO:0007017 microtubule-based process                             | 28 | 0.0113  |
| GO:0019318 hexose metabolic process                              | 23 | 0.0116  |
| GO:0016568 chromatin modification                                | 25 | 0.0123  |
| GO:0046164 alcohol catabolic process                             | 14 | 0.0124  |
| GO:0006839 mitochondrial transport                               | 9  | 0.013   |
| GO:0042440 pigment metabolic process                             | 8  | 0.0136  |
| GO:0006007 glucose catabolic process                             | 12 | 0.0136  |
| GO:0006066 alcohol metabolic process                             | 38 | 0.0152  |
| GO:0051726 regulation of cell cycle                              | 64 | 0.0168  |
| GO:0006020 myo-inositol metabolic process                        | 3  | 0.017   |
| GO:0006266 DNA ligation                                          | 3  | 0.017   |
| GO:0043094 metabolic compound salvage                            | 3  | 0.017   |
| GO:0008203 cholesterol metabolic process                         | 13 | 0.0177  |
| GO:0009066 aspartate family amino acid metabolic process         | 5  | 0.0189  |
| GO:0006338 chromatin remodeling                                  | 10 | 0.0193  |
| GO:0019320 hexose catabolic process                              | 13 | 0.0199  |
| GO:0046148 pigment biosynthetic process                          | 7  | 0.0205  |
| GO:0051301 cell division                                         | 30 | 0.0212  |
| GO:0000074 regulation of progression through cell cycle          | 63 | 0.0218  |
| GO:0045786 negative regulation of progression through cell cycle | 27 | 0.0241  |
| GO:0006304 DNA modification                                      | 5  | 0.0246  |
| GO:0008584 male gonad development                                | 5  | 0.0246  |
| GO:0016358 dendrite development                                  | 5  | 0.0246  |

| Cellular Component Results, GO id term      | Nr genes | p-values |
|---------------------------------------------|----------|----------|
| GO:0031966 mitochondrial membrane           | 32       | 0.00368  |
| GO:0005739 mitochondrion                    | 94       | 0.00491  |
| GO:0005740 mitochondrial envelope           | 33       | 0.00689  |
| GO:0005602 complement component C1q complex | 2        | 0.0102   |
| GO:0005916 fascia adherens                  | 2        | 0.0102   |
| GO:0005730 nucleolus                        | 21       | 0.0141   |

|                                         |     |        |
|-----------------------------------------|-----|--------|
| GO:0005874 microtubule                  | 28  | 0.0156 |
| GO:0005615 extracellular space          | 60  | 0.0171 |
| GO:0005737 cytoplasm                    | 405 | 0.0195 |
| GO:0044429 mitochondrial part           | 39  | 0.0199 |
| GO:0005743 mitochondrial inner membrane | 25  | 0.0219 |
| GO:0005913 cell-cell adherens junction  | 5   | 0.0232 |

| Molecular Function Results, GO id term                                                               | Nr genes | p-values    |
|------------------------------------------------------------------------------------------------------|----------|-------------|
| GO:0005132 interferon-alpha/beta receptor binding                                                    | 10       | 1.24E-10    |
| GO:0005126 hematopoietin/interferon-class (D200-domain) cytokine receptor binding                    | 17       | 0.000000194 |
| GO:0004033 aldo-keto reductase activity                                                              | 7        | 0.0000579   |
| GO:0004668 protein-arginine deiminase activity                                                       | 4        | 0.000109    |
| GO:0016810 hydrolase activity, acting on carbon-nitrogen (but not peptide) bonds                     | 22       | 0.000166    |
| GO:0008132 pancreatic elastase activity                                                              | 4        | 0.000501    |
| GO:0042708 elastase activity                                                                         | 4        | 0.000501    |
| GO:0003840 gamma-glutamyltransferase activity                                                        | 4        | 0.00138     |
| GO:0016813 hydrolase activity, acting on carbon-nitrogen (but not peptide) bonds, in linear amidines | 5        | 0.00181     |
| GO:0016814 hydrolase activity, acting on carbon-nitrogen (but not peptide) bonds, in cyclic amidines | 9        | 0.00181     |
| GO:0004623 phospholipase A2 activity                                                                 | 8        | 0.00194     |
| GO:0003824 catalytic activity                                                                        | 511      | 0.0022      |
| GO:0004430 1-phosphatidylinositol 4-kinase activity                                                  | 3        | 0.00395     |
| GO:0047115 trans-1,2-dihydrobenzene-1,2-diol dehydrogenase activity                                  | 3        | 0.00395     |
| GO:0004437 inositol or phosphatidylinositol phosphatase activity                                     | 8        | 0.00566     |
| GO:0016789 carboxylic ester hydrolase activity                                                       | 20       | 0.00633     |
| GO:0016298 lipase activity                                                                           | 15       | 0.0073      |
| GO:0016491 oxidoreductase activity                                                                   | 86       | 0.00829     |
| GO:0004806 triacylglycerol lipase activity                                                           | 4        | 0.00901     |
| GO:0008013 beta-catenin binding                                                                      | 3        | 0.00911     |
| GO:0047498 calcium-dependent phospholipase A2 activity                                               | 3        | 0.00911     |
| GO:0016746 transferase activity, transferring acyl groups                                            | 26       | 0.00943     |
| GO:0004098 cerebroside-sulfatase activity                                                            | 2        | 0.0105      |
| GO:0004281 pancreatic elastase II activity                                                           | 2        | 0.0105      |
| GO:0004452 isopentenyl-diphosphate delta-isomerase activity                                          | 2        | 0.0105      |
| GO:0004537 caspase-activated deoxyribonuclease activity                                              | 2        | 0.0105      |
| GO:0004911 interleukin-2 receptor activity                                                           | 2        | 0.0105      |
| GO:0005147 oncostatin-M receptor binding                                                             | 2        | 0.0105      |
| GO:0005161 platelet-derived growth factor receptor binding                                           | 2        | 0.0105      |
| GO:0005353 fructose transporter activity                                                             | 2        | 0.0105      |
| GO:0008451 X-Pro aminopeptidase activity                                                             | 2        | 0.0105      |
| GO:0016314 phosphatidylinositol-3,4,5-trisphosphate 3-phosphatase activity                           | 2        | 0.0105      |
| GO:0018675 (S)-limonene 6-monooxygenase activity                                                     | 2        | 0.0105      |
| GO:0018676 (S)-limonene 7-monooxygenase activity                                                     | 2        | 0.0105      |
| GO:0019113 limonene monooxygenase activity                                                           | 2        | 0.0105      |
| GO:0019976 interleukin-2 binding                                                                     | 2        | 0.0105      |
| GO:0032052 bile acid binding                                                                         | 2        | 0.0105      |
| GO:0051219 phosphoprotein binding                                                                    | 4        | 0.0138      |
| GO:0008415 acyltransferase activity                                                                  | 24       | 0.0156      |
| GO:0016791 phosphoric monoester hydrolase activity                                                   | 32       | 0.0165      |
| GO:0001948 glycoprotein binding                                                                      | 3        | 0.0168      |



|                                                                                   |     |        |
|-----------------------------------------------------------------------------------|-----|--------|
| GO:0008171 O-methyltransferase activity                                           | 3   | 0.0168 |
| GO:0016747 transferase activity, transferring groups other than amino-acyl groups | 24  | 0.0169 |
| GO:0016755 transferase activity, transferring amino-acyl groups                   | 5   | 0.0186 |
| GO:0016918 retinal binding                                                        | 4   | 0.02   |
| GO:0016787 hydrolase activity                                                     | 218 | 0.0217 |
| GO:0031072 heat shock protein binding                                             | 11  | 0.0219 |
| GO:0004721 phosphoprotein phosphatase activity                                    | 23  | 0.0224 |
| GO:0004722 protein serine/threonine phosphatase activity                          | 8   | 0.0225 |

Table S4.

| Chrom | Band                                 | From (Mb) | To (Mb) | Size (Mb) | Aberration * | Number of tumors | Underexpressed/Overexpressed genes                                      |
|-------|--------------------------------------|-----------|---------|-----------|--------------|------------------|-------------------------------------------------------------------------|
| 1     | p36.31                               | 5.87      | 6.35    | 0.48      | del          | 19               | ACOT7,NPHP4,KCNAB2,ICMT,CHD5,GPR153                                     |
| 1     | p36.23                               | 7.86      | 8.84    | 0.98      | del          | 19               | ENO1,TNFRSF9,DKFZp566H0824                                              |
| 1     | p36.13,p36.12                        | 16.66     | 22.68   | 6.02      | del          | 11               | PADI3,LOC391012,PADI4,LOC729604,RNF186,PAX7,PLA2G2E,ACTL8,ELA3A,PADI1   |
| 1     | p36.11,p35.3                         | 25.18     | 28.90   | 3.72      | del          | 14               | FAM76A,GPR3,NR0B2,AIM1L,EXTL1,MED18,PAFAH2,PPP1R8,NUDC,RHD              |
| 1     | p34.3                                | 36.22     | 38.08   | 1.86      | del          | 12               | TEKT2,C1orf113,GRIK3,THRAP3                                             |
| 1     | p33,p32.3                            | 48.84     | 52.13   | 3.29      | del          | 8                | C1orf34                                                                 |
| 1     | p31.1                                | 73.45     | 76.02   | 2.57      | del          | 6                | TNNI3K                                                                  |
| 1     | p31.1                                | 77.79     | 84.06   | 6.26      | del          | 7                | USP33,ARID3B                                                            |
| 1     | p22.2,p22.1                          | 90.93     | 94.00   | 3.07      | del          | 7                | BRDT,hCG_1811337,EVI5,DR1,BTBD8,LOC388907,LOC642146,LOC647436,RPL5,GF11 |
| 1     | q41                                  | 216.86    | 221.28  | 4.42      | del          | 4                | KIAA1822L,BPNT1,MOSC1,C1orf115                                          |
| 1     | q41,q42.11,q42.12                    | 221.39    | 223.15  | 1.76      | del          | 4                | CAPN2                                                                   |
| 1     | q42.13,q42.2                         | 227.30    | 229.16  | 1.86      | del          | 3                | CAPN9,ACTA1                                                             |
| 2     | p25.3,p25.2,p25.1                    | 3.61      | 8.33    | 4.73      | del          | 6                | ALLC,COLEC11                                                            |
| 2     | p24.1,p23.3                          | 21.04     | 25.57   | 4.54      | del          | 7                | APOB,ITSN2,FLJ14126,FKBP1B,EFR3B,LOC100131510,DTNB,POMC                 |
| 2     | p22.3,p22.2,p22.1                    | 36.22     | 38.59   | 2.37      | del          | 5                | ARL6IP2,STRN,FEZ2                                                       |
| 2     | p22.1                                | 39.48     | 40.31   | 0.83      | del          | 5                | SLC8A1                                                                  |
| 2     | p16.1                                | 55.84     | 60.56   | 4.72      | del          | 5                | VRK2,BCL11A                                                             |
| 2     | p15,p14,p13.3                        | 63.80     | 71.04   | 7.25      | del          | 6                | BMP10,TGFA,ADD2,ANTXR1,AAK1,PNO1,GKN1,CD207                             |
| 2     | p13.1,p12                            | 74.64     | 80.08   | 5.44      | del          | 6                | REG1A,SEMA4F,TACR1,REG1B,REGL,REG3A                                     |
| 2     | q14.3                                | 122.98    | 127.89  | 4.91      | del          | 5                | MAP3K2,BIN1                                                             |
| 2     | q36.3                                | 227.87    | 229.09  | 1.22      | del          | 7                | COL4A3,DKFZp547H025,COL4A3,SLC19A3,TM4SF20,HRB                          |
| 2     | q37.3                                | 238.25    | 239.26  | 1.02      | del          | 10               | SCLY,PER2,ASB1                                                          |
| 3     | p26.1                                | 5.63      | 8.16    | 2.54      | del          | 3                | GRM7                                                                    |
| 3     | p21.31,p21.2,p21.1,p14.3,p14.2,p14.1 | 51.39     | 70.55   | 19.16     | del          | 4                | LRTM1,GRM2,2-PDE,SUCLG2,CACNA1D,HESX1,ABHD6,PHF7,FRMD4B,ITIH3           |
| 3     | q13.33,q21.1,q21.2,q21.3             | 122.60    | 130.18  | 7.58      | del          | 3                | CCDC37,GATA2,ROPN1B,UMPS,ZNF148,CASR,FBXO40,C3orf28,KLF15,KALRN         |
| 4     | p16.3                                | 1.47      | 1.69    | 0.22      | del          | 4                |                                                                         |
| 4     | p16.2                                | 4.69      | 5.03    | 0.35      | del          | 4                |                                                                         |
| 4     | p16.1                                | 8.94      | 9.57    | 0.63      | del          | 4                | SLC2A9                                                                  |
| 4     | p15.2,p15.1,p14,p13,p12              | 26.08     | 47.56   | 21.48     | del          | 4                | CCKAR,CORIN,TBC1D1,RHOH,PHOX2B,APBB2,PDS5A,PABPCP1,PCDH7                |
| 4     | q31.21,q31.22                        | 144.41    | 147.44  | 3.02      | del          | 4                | GYPB,GYPB,GYPE,GYPB,GYPE                                                |
| 4     | q32.3                                | 166.72    | 168.17  | 1.45      | del          | 7                | TLL1                                                                    |

|    |                                                                                            |        |        |       |     |    |                                                                         |
|----|--------------------------------------------------------------------------------------------|--------|--------|-------|-----|----|-------------------------------------------------------------------------|
| 4  | q33,q34.1,q34.2,q34.3,q35.1,q35.2                                                          | 170.48 | 191.14 | 20.66 | del | 7  | ADAM29,MTNR1A,SAP30,NEK1,GLRA3,ING2,F11,GALNT7,NBLA00301                |
| 5  | q34,q35.1                                                                                  | 159.93 | 169.91 | 9.98  | del | 3  | FOXI1,SLIT3,MIRN218-2,LOC728095,MIRN585,ODZ2,GABRA6,PANK3,GABRB2,ATP10B |
| 6  | p24.1,p23,p22.3,p22.2,p22.1,p21.33,p21.32,p21.31,p21.2,p21.1,p12.3,p12.2,p12.1,p11.2,p11.1 | 11.85  | 58.85  | 47.00 | del | 4  | CLPS,GPX5,TAP2,OR10C1,OR2J2,GSTA1,TFAP2B,CDKAL1,POM121L2                |
| 6  | q14.1,q14.2,q14.3,q15,q16.1,q16.2,q16.3,q21                                                | 77.45  | 109.45 | 32.00 | del | 7  | RARS2,LOC100130683,GABRR2,PRDM1,HTR1B,GABRR1,KRT18P50,CGA,ME1           |
| 6  | q23.3,q24.1,q24.2,q24.3,q25.1,q25.2,q25.3                                                  | 137.33 | 157.51 | 20.18 | del | 10 | PBOV1,OPRM1,ESR1,LOC442271,MYCT1,ADAT2,EPM2A                            |
| 6  | q26,q27                                                                                    | 162.33 | 165.59 | 3.26  | del | 10 | PARK2                                                                   |
| 8  | p21.2,p21.1,p12                                                                            | 24.79  | 30.26  | 5.48  | del | 4  | ADRA1A,DOCK5,EBF2,CHRNA2,PTK2B,NEFL                                     |
| 8  | p12                                                                                        | 32.97  | 33.94  | 0.97  | del | 4  | RNF122                                                                  |
| 8  | p12                                                                                        | 34.46  | 36.61  | 2.15  | del | 4  | UNC5D                                                                   |
| 8  | q11.21,q11.22                                                                              | 49.12  | 52.06  | 2.94  | del | 3  | SNTG1,EFCAB1                                                            |
| 8  | q24.12                                                                                     | 119.66 | 121.31 | 1.65  | del | 4  | COL14A1,DCC1,COLEC10                                                    |
| 8  | q24.21,q24.22                                                                              | 130.91 | 134.86 | 3.95  | del | 4  | ST3GAL1,FAM49B,HHLA1,TG,KCNQ3,WISP1,TG,SLA                              |
| 9  | p24.3,p24.2,p24.1                                                                          | 1.57   | 6.10   | 4.53  | del | 20 | RLN1,RLN2,KCNV2,INSL6,MLANA,C9orf68,INSL4,PDCD1LG2,RFX3                 |
| 9  | p21.3                                                                                      | 21.21  | 21.97  | 0.76  | del | 46 | IFNA@,MTAP,CDKN2A                                                       |
| 9  | p13.1,p12,p11.2                                                                            | 40.18  | 46.28  | 6.11  | del | 9  | FAM75A1,FAM75A2,FAM75A3,FAM75A4,FAM75A5,FAM75A7,RP11-138L21.1           |
| 9  | q12                                                                                        | 67.48  | 69.19  | 1.71  | del | 6  |                                                                         |
| 9  | q31.1,q31.2,q31.3                                                                          | 103.65 | 112.27 | 8.62  | del | 5  | ACTL7A,EPB41L4B,CYLC2,ABCA1,ACTL7B,SVEP1,PTPN3                          |
| 9  | q33.3,q34.11                                                                               | 125.90 | 130.84 | 4.94  | del | 8  | NR6A1,SPTAN1,LOC51145,SH2D3C,ZNF79,FLJ10232,C9orf16,FAM125B             |
| 10 | p12.1,p11.23,p11.22                                                                        | 28.05  | 33.32  | 5.27  | del | 72 | LOC645954,LOC731954,ITGB1,C10orf68,EPC1,LOC283079,SVIL                  |
| 10 | q21.2,q21.3                                                                                | 61.25  | 67.80  | 6.55  | del | 71 | ANK3,CTNNA3,ANXA2P3                                                     |
| 10 | q23.2,q23.31                                                                               | 89.59  | 90.40  | 0.81  | del | 73 | PTEN,C10orf59                                                           |
| 10 | q26.12,q26.13,q26.2,q26.3                                                                  | 122.85 | 135.35 | 12.51 | del | 73 | GLRX3,ADAM12,UTF1,VENTX,CUZD1,FLJ12616,FGFR2,DMBT1,CYP2E1               |
| 11 | p15.5,p15.4,p15.3,p15.2,p15.1                                                              | 0.20   | 18.81  | 18.61 | del | 12 | MUC5B,EIF3F,NAP1L4,ART1,PNPLA2,KIAA0409,SWAP70,PPFIBP2,MMP26            |
| 11 | q12.1,q12.2,q12.3,q13.1                                                                    | 59.47  | 64.75  | 5.28  | del | 8  | MS4A2,SCGB1A1,MARK2,MS4A12,HRASLS2,SCGB1D1,SLC22A6,SLC22A8,SCGB2A2,EML3 |
| 11 | q14.1                                                                                      | 78.60  | 80.65  | 2.05  | del | 5  |                                                                         |
| 11 | q22.1,q22.2,q22.3                                                                          | 99.64  | 104.35 | 4.71  | del | 6  | MMP27,MMP20,MMP8,TRPC6,PGR,PPIA,PPIAL3,PPIAP8                           |
| 11 | q24.2,q24.3,q25                                                                            | 126.85 | 130.94 | 4.09  | del | 7  | ST14,KCNJ1,KCNJ5,EWSR1,FLI1,APLP2,BARX2,PRDM10                          |

|    |                                                                             |        |        |       |     |    |                                                                     |
|----|-----------------------------------------------------------------------------|--------|--------|-------|-----|----|---------------------------------------------------------------------|
| 12 | q12,q13.11,q13.12                                                           | 39.22  | 48.03  | 8.81  | del | 3  | LALBA,VDR,ADCY6,CACNB3,DDX23,RND1,P11,HSU79275,MLL2,PUS7L           |
| 12 | q13.2,q13.3                                                                 | 54.23  | 56.00  | 1.77  | del | 4  | MYO1A,CIP29,GPR182,MMP19,IL23A,CDK2,RDH16,MIP,NXPH4,APOF            |
| 12 | q14.1,q14.2                                                                 | 58.26  | 63.13  | 4.87  | del | 4  | LOC100133321,AVPR1A                                                 |
| 12 | q14.3,q15                                                                   | 65.51  | 67.06  | 1.55  | del | 5  | IL22,IFNG,IL26,DYRK2                                                |
| 12 | q21.1,q21.2,q21.31                                                          | 73.18  | 78.86  | 5.69  | del | 4  | CAPS2,PAWR,ZDHHC17,KCNC2,SYT1                                       |
| 12 | q24.31,q24.32,q24.33                                                        | 124.06 | 129.97 | 5.91  | del | 4  | LOC400084,PIWIL1,FZD10,RIMBP2                                       |
| 13 | q12.13,q12.2,q12.3,q13.1,q13.2,q13.3,q14.11,q14.12,q14.13,q14.2,q14.3,q21.1 | 26.57  | 52.56  | 25.99 | del | 20 | GUCY1B2,TNFSF11,FLT3,SPG20,PDX1,CPB2,CYSLTR2,FAM48A,CG030           |
| 13 | q21.31,q21.32                                                               | 63.45  | 65.01  | 1.56  | del | 20 |                                                                     |
| 13 | q31.1,q31.2,q31.3                                                           | 85.72  | 91.33  | 5.61  | del | 17 | RP11-114G1.1,KRT18P27                                               |
| 13 | q32.1,q32.2,q32.3,q33.1                                                     | 96.34  | 100.78 | 4.44  | del | 17 | RAP2A,DOCK9,SLC15A1,MBNL2,PCCA,GPR18,STK24                          |
| 13 | q33.2,q33.3,q34                                                             | 104.81 | 114.09 | 9.29  | del | 16 | ATP4B,F10,PROZ,SOX1,RASA3,GRTP1,MGC2780,F7,GRK1                     |
| 14 | q11.2,q12                                                                   | 22.18  | 26.10  | 3.92  | del | 13 | NRL,SLC22A17,NFATC4,IL25,TGM1,GZMB,SLC7A8,DHRS2,LTB4R               |
| 14 | q22.1                                                                       | 50.66  | 51.96  | 1.31  | del | 13 | PTGDR,LOC100131689                                                  |
| 14 | q22.2,q22.3,q23.1,q23.2,q23.3,q24.1                                         | 53.49  | 67.18  | 13.69 | del | 13 | C14orf135,AKAP5,GPR135,DHRS7,ESR2,GPX2,SAMD4A,PLEKHG3               |
| 14 | q24.3,q31.1,q31.2,q31.3,q32.11,q32.12,q32.13,q32.2,q32.31                   | 75.41  | 101.73 | 26.32 | del | 12 | TCL1A,KCNK13,FOXN3,SERPINA6,DIO3,MYO5A,CATSPERB,TCL6,OTUB2          |
| 15 | q14,q15.1                                                                   | 33.28  | 38.86  | 5.59  | del | 13 | THBS1,CASC5,PLCB2,GPR176,RPUSD2,GCHFR,IVD                           |
| 15 | q26.1,q26.2                                                                 | 91.13  | 95.88  | 4.75  | del | 7  | CHD2,MCTP2                                                          |
| 16 | p12.2,p12.1                                                                 | 20.64  | 24.09  | 3.46  | del | 8  | DNAH3,SCNN1G,GGA2,ACSM3,CHP2,TMEM159,ERN2                           |
| 16 | q21,q22.1                                                                   | 64.59  | 65.87  | 1.29  | del | 8  | CA7,TK2,E2F4,DYNC1LI2,HSF4,CDH16,TRADD,C16orf70                     |
| 16 | q24.1,q24.2,q24.3                                                           | 82.99  | 88.70  | 5.71  | del | 6  | CA5A,LOC642452,LOC651791,FOXL1,CDH15,KIAA1609,FLJ12547,DPEP1,ATP2C2 |
| 17 | p13.3,p13.2,p13.1                                                           | 2.94   | 7.91   | 4.97  | del | 6  | PITPNM3,OR1D4,OR1D5,CTNS,DNAH2,ALOX12,ALOX12P2,OR1A2,YBX2,OR1A1     |
| 17 | p12                                                                         | 12.93  | 14.90  | 1.97  | del | 6  | HS3ST3B1,COX10                                                      |
| 17 | q12,q21.1,q21.2,q21.31                                                      | 33.82  | 38.40  | 4.58  | del | 6  | IKZF3,KRT34,CACNB1,KRT20,MED24,KCNH4,KRT37,KRT35,TNS4               |
| 17 | q23.2,q23.3,q24.1,q24.2,q24.3,q25.1                                         | 55.87  | 69.93  | 14.06 | del | 3  | APOH,CSHL1,KCNH6,CSH1,PRKCA,CSH1,CSH2,CSHL1,GH1,GH2                 |
| 17 | q25.1,q25.2,q25.3                                                           | 72.11  | 76.76  | 4.65  | del | 3  | CARD14,SEPT9,FLJ21865,CCDC40,CBX2,CARD14,CBX8,SOCS3                 |
| 18 | p11.32,p11.31,p11.23,p11.22                                                 | 0.02   | 9.79   | 9.77  | del | 13 | EMILIN2,ARHGAP28,PTPRM,YES1,CETN1,ADCYAP1,DLGAP1,TYMS               |
| 18 | q12.3                                                                       | 39.76  | 41.31  | 1.55  | del | 8  |                                                                     |
| 18 | q22.2,q22.3                                                                 | 66.09  | 68.40  | 2.31  | del | 11 |                                                                     |

|    |                                        |        |        |       |      |    |                                                                               |
|----|----------------------------------------|--------|--------|-------|------|----|-------------------------------------------------------------------------------|
| 19 | q13.33                                 | 54.51  | 56.31  | 1.80  | del  | 10 | KLK8,KLK5,KLK10,KLK11,KLK13,TSKS,PRRG2,MED25                                  |
| 19 | q13.41                                 | 57.78  | 58.34  | 0.56  | del  | 9  | LOC731901,ZNF816A                                                             |
| 21 | q21.1                                  | 19.90  | 22.20  | 2.29  | del  | 6  | NCAM2                                                                         |
| 21 | q22.11,q22.12,q22.13                   | 33.58  | 38.08  | 4.50  | del  | 5  | DYRK1A,RUNX1,DOPEY2,KCNE2,ITSN1                                               |
| 22 | q11.23,q12.1,q12.2,q12.3               | 22.51  | 33.32  | 10.81 | del  | 30 | C22orf24,SLC5A1,LRP5L,RHBDD3,UPB1,CRYBA4,RFPL1,NF2                            |
| 22 | q12.3,q13.1,q13.2,q13.31,q13.32,q13.33 | 35.61  | 49.57  | 13.96 | del  | 29 | ACO2,POLR3H,BIK,SERHL,SERHL2,FBLN1,POLDIP3,ZC3H7B,XRCC6,ACR,CELSR1            |
| 1  | p36.21                                 | 13.56  | 13.84  | 0.28  | gain | 4  |                                                                               |
| 1  | p34.2                                  | 39.64  | 40.34  | 0.69  | gain | 4  | PPT1,PABPC4,CAP1,MACF1,TRIT1                                                  |
| 1  | p34.2                                  | 42.56  | 43.01  | 0.46  | gain | 4  | YBX1,FOXJ3                                                                    |
| 1  | p13.2                                  | 114.88 | 115.56 | 0.68  | gain | 5  | BCAS2,CSDE1                                                                   |
| 1  | q21.1,q21.2,q21.3                      | 143.05 | 151.54 | 8.49  | gain | 8  | CCT8,NBPF@,XXyac-YX155B6.1,ANP32E,VPS45,RBM8A,GPR89A,GPR89B,GPR89C,MCL1,CHD1L |
| 1  | q25.3                                  | 179.41 | 179.62 | 0.20  | gain | 6  |                                                                               |
| 1  | q31.1                                  | 184.51 | 185.51 | 1.00  | gain | 6  | C1orf27,TPR                                                                   |
| 1  | q32.1                                  | 202.72 | 203.41 | 0.69  | gain | 9  |                                                                               |
| 1  | q43,q44                                | 241.24 | 242.33 | 1.09  | gain | 8  | AKT3                                                                          |
| 2  | p24.3                                  | 14.72  | 16.15  | 1.44  | gain | 4  | DDX1,NAG                                                                      |
| 2  | p22.1                                  | 38.47  | 39.53  | 1.05  | gain | 3  | RPLP0,SFRS7,SOS1,MAP4K3                                                       |
| 2  | p21                                    | 42.69  | 43.41  | 0.72  | gain | 3  | ZFP36L2                                                                       |
| 3  | q11.2,q12.1                            | 95.08  | 101.19 | 6.11  | gain | 5  | HNRPK,PROS1                                                                   |
| 3  | q13.13,q13.2,q13.31,q13.32,q13.33      | 112.25 | 120.94 | 8.69  | gain | 5  | NAT13,ATG3,SLC35A5,ZBTB20,DULLARD                                             |
| 3  | q22.3,q23,q24                          | 139.40 | 145.80 | 6.41  | gain | 5  | SR140,SLC25A36,ATR,ARMC8,ATP1B3,COPB2,MRPS22,FAIM                             |
| 3  | q26.2,q26.31,q26.32,q26.33,q27.1       | 169.47 | 185.82 | 16.35 | gain | 9  | DVL3,FXR1,NLGN1,PIK3CA,TLOC1,FNDC3B,TNIK,RPL22,TBL1XR1,PRKCI                  |
| 3  | q28,q29                                | 191.30 | 196.50 | 5.20  | gain | 8  | CENTB2,ENAH,LSG1,NDUFB5,MFN1,PSMD2,ACTL6A,YEATS2,POLR2H                       |
| 4  | p16.3,p16.2                            | 1.54   | 4.57   | 3.03  | gain | 3  | C4orf8,MXD4,C4orf15,SLBP,WHSC1,LETM1                                          |
| 4  | p15.2                                  | 23.25  | 24.06  | 0.81  | gain | 3  |                                                                               |
| 4  | p15.2                                  | 24.95  | 26.24  | 1.29  | gain | 4  | RBPJ                                                                          |
| 4  | q11,q12                                | 52.35  | 54.56  | 2.21  | gain | 9  | SGCB,DCUN1D4                                                                  |
| 4  | q12                                    | 54.66  | 55.08  | 0.41  | gain | 12 | PDGFRA                                                                        |
| 5  | p15.33                                 | 1.26   | 1.47   | 0.21  | gain | 5  |                                                                               |
| 7  | p22.3,p22.2                            | 1.25   | 2.12   | 0.87  | gain | 61 |                                                                               |
| 7  | p15.3,p15.2                            | 21.42  | 26.56  | 5.13  | gain | 64 | HNRNPA2B1,CBX3,LOC653972,CBX3,LOC653972,TRA2A,TRA2A,NUPL2,TOMM7,DFNA5         |
| 7  | p15.1                                  | 29.61  | 31.17  | 1.57  | gain | 64 | DKFZp586l1420,C7orf24                                                         |
| 7  | p14.3                                  | 32.69  | 33.00  | 0.32  | gain | 63 | KBTBD2                                                                        |
| 7  | p14.3,p14.2                            | 35.00  | 35.75  | 0.75  | gain | 63 |                                                                               |
| 7  | p12.3                                  | 47.61  | 49.60  | 2.00  | gain | 64 | CDC14B                                                                        |

|    |                            |        |        |      |      |    |                                                           |
|----|----------------------------|--------|--------|------|------|----|-----------------------------------------------------------|
| 7  | p12.3,p12.2                | 49.62  | 49.82  | 0.20 | gain | 64 |                                                           |
| 7  | p11.2                      | 54.79  | 55.49  | 0.70 | gain | 68 | SEC61G,EGFR                                               |
| 7  | q11.21                     | 61.99  | 62.92  | 0.93 | gain | 62 |                                                           |
| 7  | q11.22                     | 68.58  | 69.10  | 0.53 | gain | 61 | AUTS2                                                     |
| 7  | q11.23                     | 73.58  | 74.75  | 1.17 | gain | 58 | GTF2I,GTF2IP1,LOC100093631,LOC732437,GTF2I,GTF2IP1,PMS2L5 |
| 7  | q11.23,q21.11              | 77.03  | 81.35  | 4.32 | gain | 62 | PHTF2,PTPN12                                              |
| 7  | q21.13                     | 89.44  | 89.66  | 0.23 | gain | 62 |                                                           |
| 7  | q21.13,q21.2,q21.3         | 90.70  | 95.07  | 4.38 | gain | 62 | AKAP9,PON2,KRIT1,SGCE,BET1,GATAD1,DKFZP564O0523           |
| 7  | q22.1,q22.2                | 102.83 | 105.60 | 2.78 | gain | 60 | SRPK2,PUS7,RINT1,ORC5L,SYPL1                              |
| 7  | q32.2,q32.3,q33            | 129.53 | 137.17 | 7.64 | gain | 60 | EEF1G,LOC729998,KIAA0265,CALD1,PTN,NUP205,CNOT4,MEST      |
| 9  | p24.3,p24.2,p24.1          | 1.88   | 4.61   | 2.73 | gain | 6  |                                                           |
| 9  | p23,p22.3                  | 12.70  | 15.51  | 2.81 | gain | 7  | PSIP1,NFIB                                                |
| 9  | p22.3,p22.2,p22.1          | 16.08  | 18.74  | 2.66 | gain | 5  |                                                           |
| 9  | p21.1,p13.3                | 32.70  | 33.78  | 1.08 | gain | 7  | DNAJA1,CHMP5                                              |
| 9  | p11.2                      | 44.74  | 46.28  | 1.54 | gain | 5  |                                                           |
| 9  | q21.33                     | 88.26  | 89.49  | 1.23 | gain | 8  |                                                           |
| 9  | q22.31                     | 93.04  | 94.36  | 1.32 | gain | 8  | SPTLC1,IARS,NOL8,NFIL3                                    |
| 9  | q31.3                      | 111.36 | 112.01 | 0.65 | gain | 9  |                                                           |
| 9  | q32,q33.1,q33.2            | 114.00 | 123.03 | 9.03 | gain | 9  | RAB14,SLC31A1,TNC,PRPF4,HSDL2,ATP6V1G1,PSMD5,POLE3        |
| 9  | q33.3                      | 126.77 | 127.41 | 0.64 | gain | 8  | GAPVD1,PPP6C,HSPA5,PRPS1                                  |
| 10 | q21.3                      | 67.75  | 69.84  | 2.09 | gain | 3  | HNRPH3                                                    |
| 11 | q13.5,q14.1                | 76.39  | 81.47  | 5.08 | gain | 3  | CLNS1A,NDUFC2,GAB2,C11orf67,ORC3L,RSF1,ALG8               |
| 11 | q23.3                      | 117.19 | 118.19 | 1.00 | gain | 3  | UBE4A,ARCN1,ATP5L                                         |
| 12 | p13.32                     | 3.14   | 3.76   | 0.63 | gain | 6  |                                                           |
| 12 | p12.1,p11.23,p11.22,p11.21 | 22.10  | 32.04  | 9.94 | gain | 6  | H3F3B,C12orf11,MED21,KRAS,MRPS35,KIAA0528,CAPRIN2         |
| 12 | q11                        | 36.14  | 36.24  | 0.10 | gain | 5  |                                                           |
| 12 | q12                        | 39.22  | 39.61  | 0.39 | gain | 5  |                                                           |
| 12 | q13.13                     | 52.49  | 53.07  | 0.58 | gain | 4  | HNRNPA@,COPZ1,CBX5                                        |
| 12 | q13.2                      | 53.31  | 53.53  | 0.23 | gain | 4  |                                                           |
| 12 | q13.2                      | 54.12  | 54.30  | 0.18 | gain | 4  |                                                           |
| 12 | q13.2                      | 54.48  | 54.72  | 0.24 | gain | 4  |                                                           |
| 12 | q13.3,q14.1                | 56.29  | 56.51  | 0.23 | gain | 19 | CDK4,OS9                                                  |
| 12 | q14.1                      | 56.96  | 58.51  | 1.55 | gain | 11 |                                                           |
| 12 | q14.1                      | 60.47  | 61.16  | 0.69 | gain | 6  |                                                           |
| 12 | q14.2                      | 62.55  | 62.66  | 0.11 | gain | 6  |                                                           |
| 12 | q14.2                      | 62.98  | 63.13  | 0.15 | gain | 6  | XPOT                                                      |
| 12 | q14.3                      | 63.99  | 64.64  | 0.64 | gain | 6  |                                                           |
| 12 | q14.3                      | 65.47  | 65.53  | 0.06 | gain | 9  |                                                           |
| 12 | q15                        | 67.30  | 67.74  | 0.44 | gain | 13 | hCG_1757335,RAP1B,NUP107,ATP5H                            |

|    |                                                     |       |       |       |      |    |                                                                 |
|----|-----------------------------------------------------|-------|-------|-------|------|----|-----------------------------------------------------------------|
| 12 | q21.1                                               | 71.41 | 71.74 | 0.33  | gain | 6  |                                                                 |
| 12 | q21.1                                               | 72.58 | 72.82 | 0.24  | gain | 6  |                                                                 |
| 12 | q21.2                                               | 74.25 | 74.63 | 0.38  | gain | 4  |                                                                 |
| 12 | q21.2                                               | 76.38 | 77.15 | 0.76  | gain | 4  |                                                                 |
| 12 | q21.2                                               | 77.77 | 78.08 | 0.32  | gain | 4  |                                                                 |
| 12 | q21.31                                              | 78.81 | 79.11 | 0.30  | gain | 4  | <i>PPP1R12A</i>                                                 |
| 13 | q31.3,q32.1                                         | 92.75 | 95.31 | 2.56  | gain | 7  |                                                                 |
| 14 | q13.3,q21.1,q21.2,q21.3,q22.1                       | 36.36 | 50.76 | 14.40 | gain | 3  | <i>SDCCAG1,COIL,PNN,SOS2,ARF6,MGAT2,SEC23A,SAV1</i>             |
| 14 | q23.3,q24.1                                         | 65.38 | 68.90 | 3.52  | gain | 3  | <i>SF3B4,ZFP36L1,EIF2S1,ATP6V1D,MPP5,RDH11</i>                  |
| 17 | q21.32                                              | 43.75 | 44.19 | 0.43  | gain | 3  |                                                                 |
| 17 | q21.33                                              | 45.75 | 46.77 | 1.02  | gain | 5  | <i>UTP18,CROP,LRRC59,SPAG9,NME1</i>                             |
| 17 | q21.33,q22                                          | 46.82 | 51.75 | 4.93  | gain | 5  | <i>MMD,PCTP</i>                                                 |
| 17 | q24.1,q24.2                                         | 60.58 | 61.64 | 1.07  | gain | 6  |                                                                 |
| 17 | q25.3                                               | 76.73 | 78.62 | 1.88  | gain | 5  | <i>ACTG1,CSNK1D,WDR45L</i>                                      |
| 18 | q23                                                 | 71.83 | 76.10 | 4.27  | gain | 4  | <i>ADNP2</i>                                                    |
| 19 | p13.2                                               | 8.36  | 9.03  | 0.67  | gain | 28 | <i>HNRPM</i>                                                    |
| 19 | q12,q13.11                                          | 32.42 | 37.60 | 5.18  | gain | 25 | <i>C19orf2,POP4,C19orf2</i>                                     |
| 19 | q13.42,q13.43                                       | 60.05 | 63.77 | 3.72  | gain | 23 | <i>CHMP2A,RPL28,LOC392424,RPS5,U2AF2,TRIM28,ZNF587</i>          |
| 20 | p13                                                 | 2.82  | 4.89  | 2.08  | gain | 27 | <i>PANK2,RASSF2,CDC25B,MGC3260,LOC390183,LOC442162</i>          |
| 20 | p12.3                                               | 5.70  | 6.15  | 0.44  | gain | 27 | <i>SYNCRIP</i>                                                  |
| 20 | q11.21,q11.22,q11.23,q12,q13.11,q13.12,q13.13,q13.2 | 29.95 | 51.57 | 21.61 | gain | 27 | <i>MAPRE1,CSE1L,RPN2,TMEM189-UBE2V1,UBE2V1,STAU1,SFRS6,DPM1</i> |
| 21 | p11.2,p11.1                                         | 9.93  | 10.14 | 0.22  | gain | 9  |                                                                 |
| 21 | q21.1,q21.2                                         | 22.14 | 23.40 | 1.26  | gain | 13 |                                                                 |
| 21 | q22.13,q22.2                                        | 38.08 | 38.68 | 0.60  | gain | 11 |                                                                 |
| 21 | q22.3                                               | 42.13 | 46.30 | 4.17  | gain | 9  | <i>PTTG1IP,RRP1B,CSTB,UBE2G2,POFUT2</i>                         |

Table S5.

| Pathway                                          | Nr. of genes | p-value | Genes                                                                                                                                                                 |
|--------------------------------------------------|--------------|---------|-----------------------------------------------------------------------------------------------------------------------------------------------------------------------|
| hsa05214:Glioma                                  | 12.0         | 0.00002 | <i>PIK3CA, PRKCA, PTEN, PDGFRA, SOS1, CDKN2A, TGFA, AKT3, EGFR, SOS2, KRAS, CDK4</i>                                                                                  |
| hsa05223:Non-small cell lung cancer              | 10.0         | 0.00022 | <i>PIK3CA, PRKCA, SOS1, CDKN2A, TGFA, AKT3, EGFR, SOS2, KRAS, CDK4</i>                                                                                                |
| hsa04912:GnRH signaling pathway                  | 12.0         | 0.00144 | <i>PRKCA, SOS1, PTK2B, PLCB2, ADCY6, EGFR, CGA, MAP3K2, SOS2, PLA2G2E, KRAS, CACNA1D</i>                                                                              |
| hsa05215:Prostate cancer                         | 11.0         | 0.00270 | <i>PIK3CA, FGFR2, CDK2, PTEN, PDGFRA, SOS1, TGFA, AKT3, EGFR, SOS2, KRAS</i>                                                                                          |
| hsa04080:Neuroactive ligand-receptor interaction | 21.0         | 0.00335 | <i>GH2, GABRR2, GLRA3, GABRB2, CGA, GABRA6, ADRA1A, GRM2, GRM7, LTB4R, OPRM1, MTNR1A, CCKAR, HTR1B, GRIK3, CSH1, GH1, CSH2, AVPR1A, CYSLTR2, PTGDR, TACR1, GABRR1</i> |
| hsa05213:Endometrial cancer                      | 8.0          | 0.00390 | <i>PIK3CA, PTEN, SOS1, AKT3, EGFR, SOS2, KRAS, CTNNA3</i>                                                                                                             |
| hsa05220:Chronic myeloid leukemia                | 9.0          | 0.01022 | <i>PIK3CA, GAB2, SOS1, CDKN2A, AKT3, RUNX1, SOS2, KRAS, CDK4</i>                                                                                                      |
| hsa04664:Fc epsilon RI signaling pathway         | 9.0          | 0.01022 | <i>PIK3CA, PRKCA, GAB2, SOS1, AKT3, SOS2, PLA2G2E, KRAS, MS4A2</i>                                                                                                    |
| hsa04540:Gap junction                            | 10.0         | 0.01516 | <i>CSNK1D, PRKCA, PDGFRA, SOS1, PLCB2, ADCY6, EGFR, MAP3K2, SOS2, KRAS</i>                                                                                            |
| hsa04510:Focal adhesion                          | 16.0         | 0.01563 | <i>PIK3CA, PRKCA, PTEN, RAP1B, AKT3, ITGB1, KRAS, ACTG1, TNC, CAPN2, PPP1R12A, SOS1, PDGFRA, EGFR, SOS2, THBS1</i>                                                    |
| hsa00363:Bisphenol A degradation                 | 4.0          | 0.01772 | <i>RDH11, PON2, DHRS7, DHRS2</i>                                                                                                                                      |
| hsa05218:Melanoma                                | 8.0          | 0.02199 | <i>PIK3CA, PTEN, PDGFRA, CDKN2A, AKT3, EGFR, KRAS, CDK4</i>                                                                                                           |
| hsa05210:Colorectal cancer                       | 9.0          | 0.02232 | <i>PIK3CA, DVL3, PDGFRA, SOS1, AKT3, EGFR, FZD10, SOS2, KRAS</i>                                                                                                      |
| hsa05221:Acute myeloid leukemia                  | 7.0          | 0.02402 | <i>PIK3CA, FLT3, SOS1, AKT3, RUNX1, SOS2, KRAS</i>                                                                                                                    |
| hsa05110:Cholera - Infection                     | 6.0          | 0.02492 | <i>ATP6V1D, PRKCA, SEC61G, ATP6V1G1, ACTG1, ARF6</i>                                                                                                                  |
| hsa04320:Dorso-ventral axis formation            | 5.0          | 0.02600 | <i>SOS1, PIWIL1, EGFR, SOS2, KRAS</i>                                                                                                                                 |
| hsa04530:Tight junction                          | 11.0         | 0.04334 | <i>SPTAN1, YES1, PRKCA, PTEN, PRKCI, MPP5, AKT3, KRAS, ACTG1, CTNNA3, CDK4</i>                                                                                        |
| hsa05211:Renal cell carcinoma                    | 7.0          | 0.05545 | <i>PIK3CA, SOS1, RAP1B, TGFA, AKT3, SOS2, KRAS</i>                                                                                                                    |
| hsa04012:ErbB signaling pathway                  | 8.0          | 0.05855 | <i>PIK3CA, PRKCA, SOS1, TGFA, AKT3, EGFR, SOS2, KRAS</i>                                                                                                              |
| hsa04010:MAPK signaling pathway                  | 17.0         | 0.06386 | <i>PRKCA, RAP1B, AKT3, MAP3K2, KRAS, MAP4K3, FGFR2, SOS1, PDGFRA, NFATC4, CACNB3, EGFR, PLA2G2E, SOS2, CACNB1, CDC25B, CACNA1D</i>                                    |
| hsa00240:Pyrimidine metabolism                   | 8.0          | 0.06808 | <i>UPB1, POLE3, UMPS, TYMS, POLR3H, TK2, NME1, POLR2H</i>                                                                                                             |
| hsa05212:Pancreatic cancer                       | 7.0          | 0.07761 | <i>PIK3CA, CDKN2A, TGFA, AKT3, EGFR, KRAS, CDK4</i>                                                                                                                   |
| hsa05219:Bladder cancer                          | 5.0          | 0.07968 | <i>CDKN2A, EGFR, KRAS, THBS1, CDK4</i>                                                                                                                                |
| hsa04660:T cell receptor signaling pathway       | 8.0          | 0.08980 | <i>PIK3CA, IFNG, SOS1, NFATC4, AKT3, SOS2, KRAS, CDK4</i>                                                                                                             |
| hsa04630:Jak-STAT signaling pathway              | 11.0         | 0.09307 | <i>PIK3CA, IFNG, GH2, SOCS3, SOS1, IL22, IL23A, AKT3, IL26, CSH1, GH1, CSH2, SOS2</i>                                                                                 |
| hsa04020:Calcium signaling pathway               | 12.0         | 0.09993 | <i>PRKCA, PDGFRA, PTK2B, PLCB2, CCKAR, EGFR, AVPR1A, CYSLTR2, SLC8A1, TACR1, CACNA1D, ADRA1A</i>                                                                      |



Table S6.

| Sample | Position (Mb)        | Ratio by 32-K | Ratio by qPCR (stdev) | Gene validated  | Reference gene |
|--------|----------------------|---------------|-----------------------|-----------------|----------------|
| G20844 | chr1: 39.84-40.34    | 10.6          | 21 (0.02)             | <i>MYCL1</i>    | <i>DNAH7</i>   |
| G23316 | chr4: 23.25-24.06    | 20.1          | 55.7 (0.00)           | <i>PPARGC1A</i> | <i>DNAH7</i>   |
| G21576 | chr5: 1.02-1.50      | 3.3           | 1.1 (0.06)            | <i>TERT</i>     | <i>DNAH7</i>   |
| G24528 | chr5: 1.02-1.78      | 4.4           | 9.5 (0.05)            | <i>TERT</i>     | <i>DNAH7</i>   |
| G20844 | chr5: 1.26-1.90      | 10.2          | 10.2 (0.01)           | <i>TERT</i>     | <i>DNAH7</i>   |
| G24064 | chr7: 25.13-26.01    | 4.6           | 3.6 (0.14)            | <i>NPVF</i>     | <i>DNAH7</i>   |
| G21804 | chr7: 29.61-31.17    | 9.6           | 49.7 (0.08)           | <i>ZNRF2</i>    | <i>DNAH7</i>   |
| G24064 | chr7: 29.99-31.15    | 4.0           | 3.7 (0.05)            | <i>ZNRF2</i>    | <i>DNAH7</i>   |
| G22118 | chr7: 30.20-30.49    | 2.2           | 3.3 (0.05)            | <i>ZNRF2</i>    | <i>DNAH7</i>   |
| G24064 | chr7: 32.41-33.32    | 8.0           | 2.7 (0.12)            | <i>LSM5</i>     | <i>DNAH7</i>   |
| G21804 | chr7: 35.17-35.69    | 5.6           | 0.8 (0.02)            | <i>HERPUD2</i>  | <i>DNAH7</i>   |
| G24064 | chr7: 35.28-35.75    | 6.7           | 6.9 (0.02)            | <i>HERPUD2</i>  | <i>DNAH7</i>   |
| G22118 | chr7: 50.07-50.97    | 2.5           | 5.5 (0.04)            | <i>GRB10</i>    | <i>DNAH7</i>   |
| G24064 | chr7: 50.16-51.36    | 3.6           | 7.7 (0.02)            | <i>GRB10</i>    | <i>DNAH7</i>   |
| G20940 | chr7: 50.41-50.79    | 5.8           | 116 (0.00)            | <i>GRB10</i>    | <i>DNAH7</i>   |
| G20890 | chr7: 50.44-50.79    | 3.7           | 1.9 (0.09)            | <i>GRB10</i>    | <i>DNAH7</i>   |
| G10    | chr7: 50.64-51.97    | 2.3           | 2.7 (0.09)            | <i>GRB10</i>    | <i>DNAH7</i>   |
| G23282 | chr9: 15.87-16.44    | 0.4           | 0.5 (0.06)            | <i>BNC2</i>     | <i>DNAH7</i>   |
| G20854 | chr9: 17.98-18.88    | 0.5           | 0.5 (0.05)            | <i>ADAMTSL1</i> | <i>DNAH7</i>   |
| G20990 | chr9: 19.43-23.05    | 0.5           | 0.3 (0.16)            | <i>PTPLAD2</i>  | <i>DNAH7</i>   |
| G29994 | chr9: 19.94-22.15    | 0.5           | 0.2 (0.01)            | <i>PTPLAD2</i>  | <i>DNAH7</i>   |
| G22686 | chr9: 20.13-23.18    | 0.6           | 0.3 (0.24)            | <i>PTPLAD2</i>  | <i>DNAH7</i>   |
| G27030 | chr9: 20.56-21.97    | 0.5           | 0.3 (0.05)            | <i>PTPLAD2</i>  | <i>DNAH7</i>   |
| G20854 | chr9: 20.56-23.56    | 0.6           | 0.5 (0.07)            | <i>PTPLAD2</i>  | <i>DNAH7</i>   |
| G29178 | chr9: 20.56-30.70    | 0.5           | 0.2 (0.05)            | <i>PTPLAD2</i>  | <i>DNAH7</i>   |
| G22334 | chr9: 21.00-22.47    | 0.4           | 0.2 (0.10)            | <i>PTPLAD2</i>  | <i>DNAH7</i>   |
| G24528 | chr9: 21.51-29.59    | 0.7           | 0.6 (0.05)            | <i>PTPLAD2</i>  | <i>DNAH7</i>   |
| G22520 | chr10: 129.37-131.18 | 0.4           | 0.5 (0.03)            | <i>PTPRE</i>    | <i>DNAH7</i>   |
| G21800 | chr11: 14.02-15.06   | 12.3          | 5.9 (0.05)            | <i>RRAS2</i>    | <i>DNAH7</i>   |
| G27622 | chr12: 76.38-77.15   | 9.4           | 17.7 (0.09)           | <i>NAV3</i>     | <i>DNAH7</i>   |
| G21864 | chr22: 26.69-26.86   | 10.4          | 6.2 (0.35)            | <i>TTC28</i>    | <i>DNAH7</i>   |

qPCR conditions and primers for all genes are available in Sup. Table 1

Table S7.

| Region | Band                | From (Mb) | To (Mb) | Size (Mb) | Genes                                                                                                                        |
|--------|---------------------|-----------|---------|-----------|------------------------------------------------------------------------------------------------------------------------------|
| A      | 12q13.1<br>3        | 52.49     | 53.03   | 0.54      | <i>HOXC13,HOXC12,HOTAIR,HOXC11,HOXC10,MIRN196A2,HOXC9,HOXC8,HOXC4,HOXC5,HOXC6,SMUG1,CBX5,HNRNPA1,NFE2,COPZ1,MIRN148B</i>     |
| B      | 12q13.2             | 53.35     | 53.55   | 0.20      | <i>VDAC5P,MUCL1</i>                                                                                                          |
| C      | 12q13.2             | 54.48     | 54.74   | 0.25      | <i>CIP29,ORMDL2,DNAJC14,MMP19,GSTPP,WIBG,DGKA,SILV,CDK2,RAB5B,SUOX,IKZF4,RPS26</i>                                           |
| D      | 12q13.3,<br>12q14.1 | 56.29     | 56.70   | 0.42      | <i>DTX3,GEFT,SLC26A10,B4GALNT1,OS9,CENTG1,TSPAN31,CDK4,MARC H9,CYP27B1,METTL1,FAM119B,TSFM,AVIL,CTDSP2,MIRN26A2,XRCC6BP1</i> |
| E      | 12q14.1             | 57.00     | 57.59   | 0.59      | <i>LRIG3</i>                                                                                                                 |
| F      | 12q14.1             | 57.76     | 58.51   | 0.75      | <i>SLC16A7</i>                                                                                                               |
| G      | 12q14.1             | 60.08     | 61.06   | 0.98      | <i>FAM19A2,KRT8P19,USP15</i>                                                                                                 |
| H      | 12q14.2             | 62.23     | 62.43   | 0.20      | <i>DPY19L2</i>                                                                                                               |
| I      | 12q14.2             | 62.55     | 62.93   | 0.38      | <i>SRGAP1,FLJ32549</i>                                                                                                       |
| J      | 12q14.2,<br>12q14.3 | 63.30     | 63.68   | 0.39      | <i>RASSF3,MIRN548C,GNS,KIAA0984,FLJ41278</i>                                                                                 |
| K      | 12q14.3             | 63.79     | 64.64   | 0.85      | <i>WIF1,LEMD3,MSRB3,HMGA2</i>                                                                                                |
| L      | 12q14.3             | 65.32     | 65.69   | 0.37      | <i>GRIP1</i>                                                                                                                 |
| M      | 12q15               | 67.30     | 68.00   | 0.70      | <i>RAP1B,NUP107,SLC35E3,MDM2,CPM,CPSF6</i>                                                                                   |
| N      | 12q15               | 67.93     | 68.56   | 0.63      | <i>CPSF6,LYZ,YEATS4,FRS2,CCT2,LRRC10,BEST3,RAB3IP,C12orf28</i>                                                               |
| O      | 12q15               | 68.59     | 69.36   | 0.76      | <i>CNOT2,KCNMB4,PTPRB,C12orf28,PTPRR</i>                                                                                     |
| P      | 12q15.1<br>2q21.1   | 69.54     | 70.61   | 1.07      | <i>PTPRR,TSPAN8,LGR5,CCDC131,THAP2,TMEM19,RAB21,TBC1D15</i>                                                                  |
| Q      | 12q21.2             | 74.25     | 74.60   | 0.35      |                                                                                                                              |
| R      | 12q21.2             | 76.38     | 77.15   | 0.76      | <i>NAV3</i>                                                                                                                  |
| S      | 12q21.2             | 77.87     | 78.11   | 0.24      | <i>SYT1</i>                                                                                                                  |
| T      | 12q21.3<br>1        | 78.81     | 79.11   | 0.30      | <i>PPP1R12A</i>                                                                                                              |

Table S8.

| Region | Band          | From (Mb) | To (Mb) | Size (Mb) | Genes                                                                                                                            |
|--------|---------------|-----------|---------|-----------|----------------------------------------------------------------------------------------------------------------------------------|
| A      | 9p23          | 9.19      | 9.87    | 0.69      | <i>PTPRD</i>                                                                                                                     |
| B      | 9p22.3        | 15.87     | 16.44   | 0.57      | <i>C9orf93,BNC2</i>                                                                                                              |
| C      | 9p22.2,9p22.1 | 17.98     | 18.88   | 0.89      | <i>ADAMTSL1</i>                                                                                                                  |
| D      | 9p21.3        | 20.13     | 21.34   | 1.20      | <i>SMNP,MLLT3,KIAA1797,MIRN491,PTPLAD2,IFNB1,IFNW1,IFNA21,IFNA4,IFNA7,IFNA10,LEIF-M,IFNA16,IFNA17,IFNA14,IFNAP22,IFNA5,KLHL9</i> |
| E      | 9p21.3        | 21.75     | 22.29   | 0.54      | <i>MTAP,C9orf53,CDKN2A,ANRIL,CDKN2B</i>                                                                                          |
| F      | 9p21.3        | 23.51     | 24.34   | 0.82      | <i>ELAVL2</i>                                                                                                                    |
| G      | 9p21.1        | 29.03     | 30.28   | 1.25      | -                                                                                                                                |
