# Supplementary material
Source: PubMed Central journal article supplement (PMC2802400)

Fig. S1

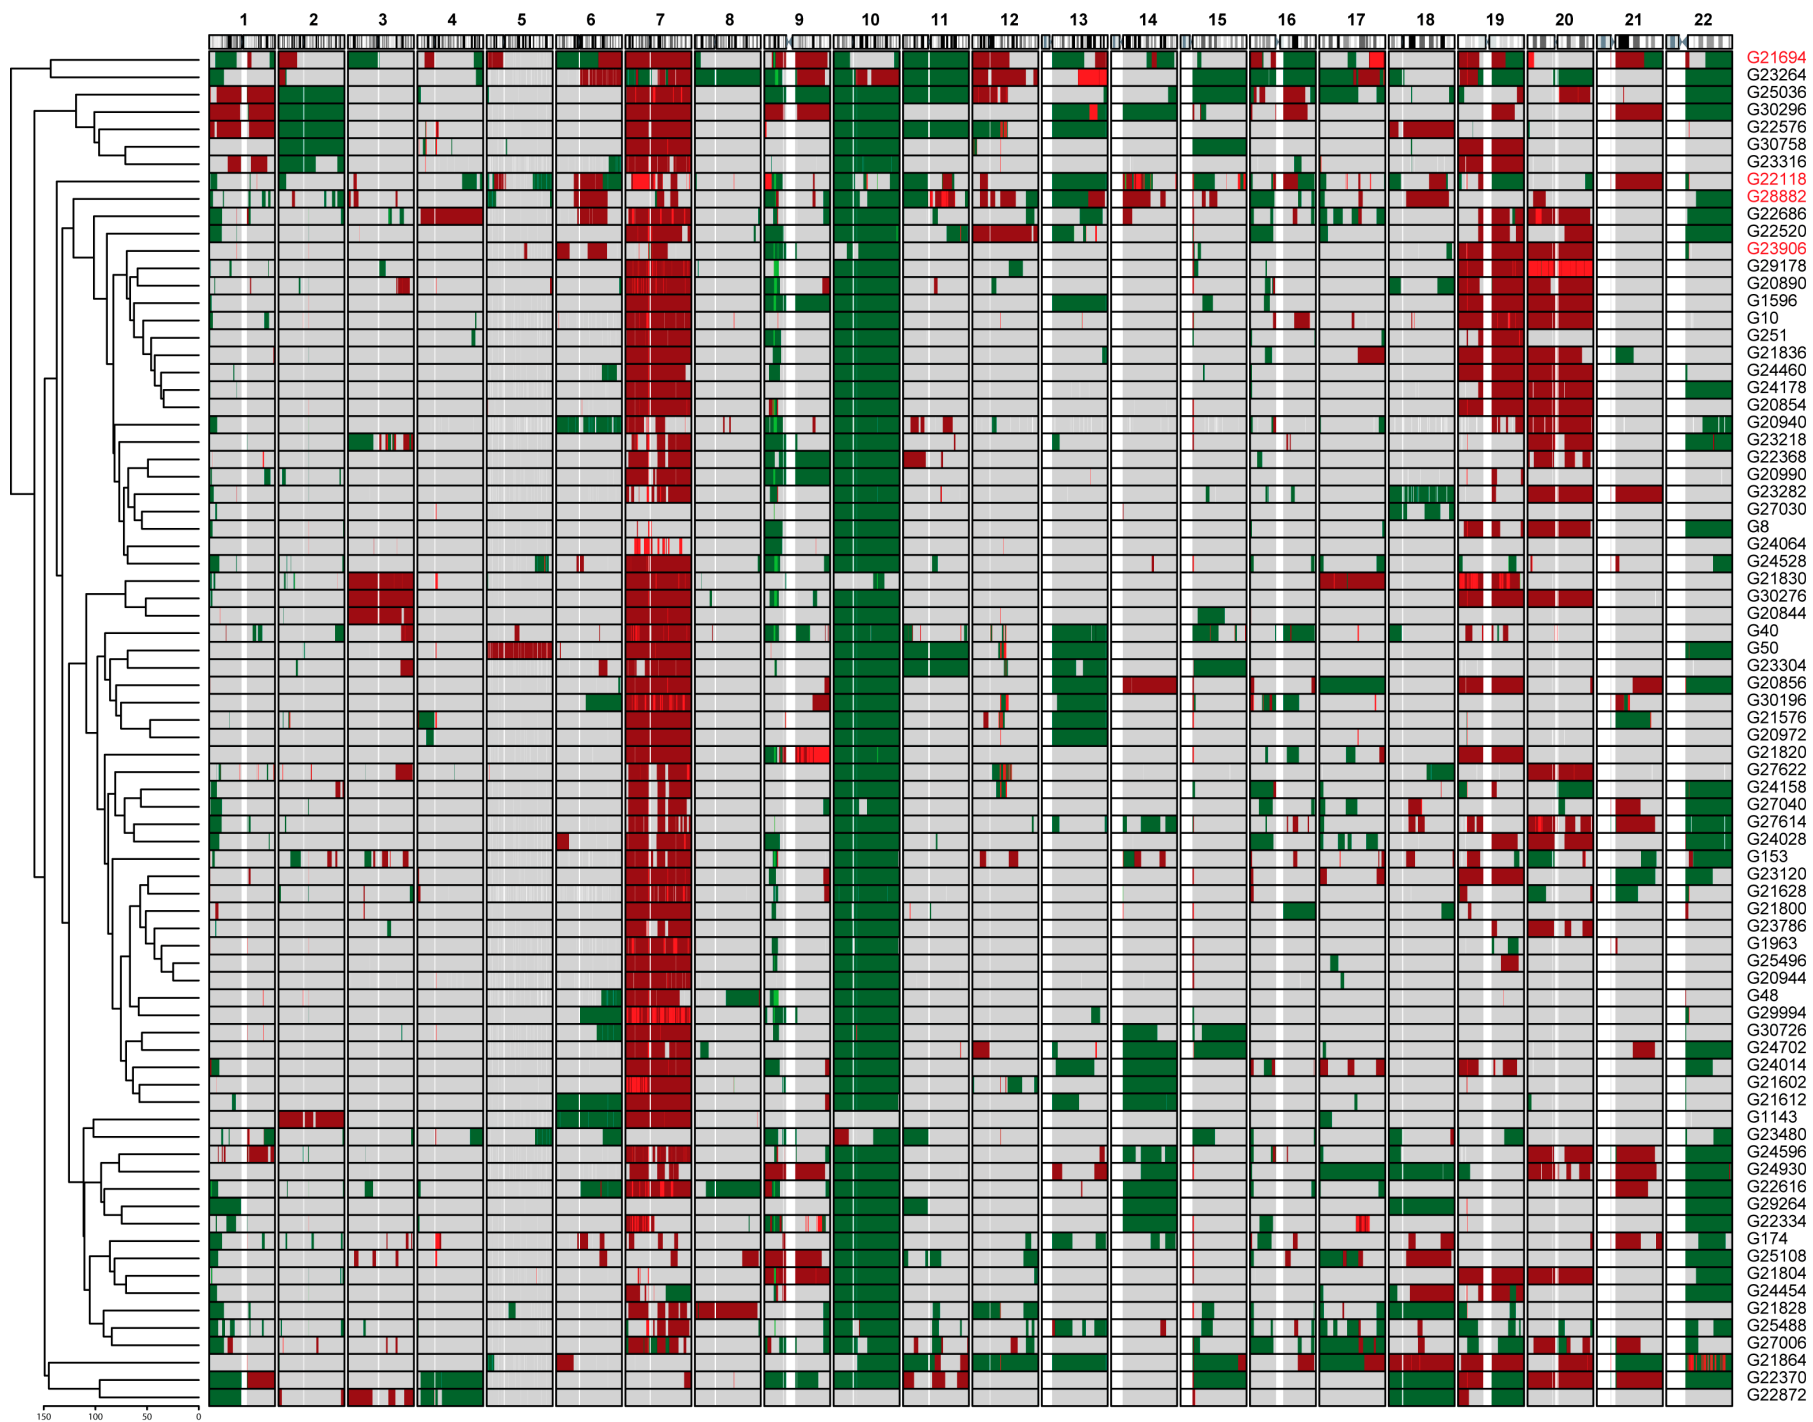

Fig. S2

### Spearman Correlation Matrix

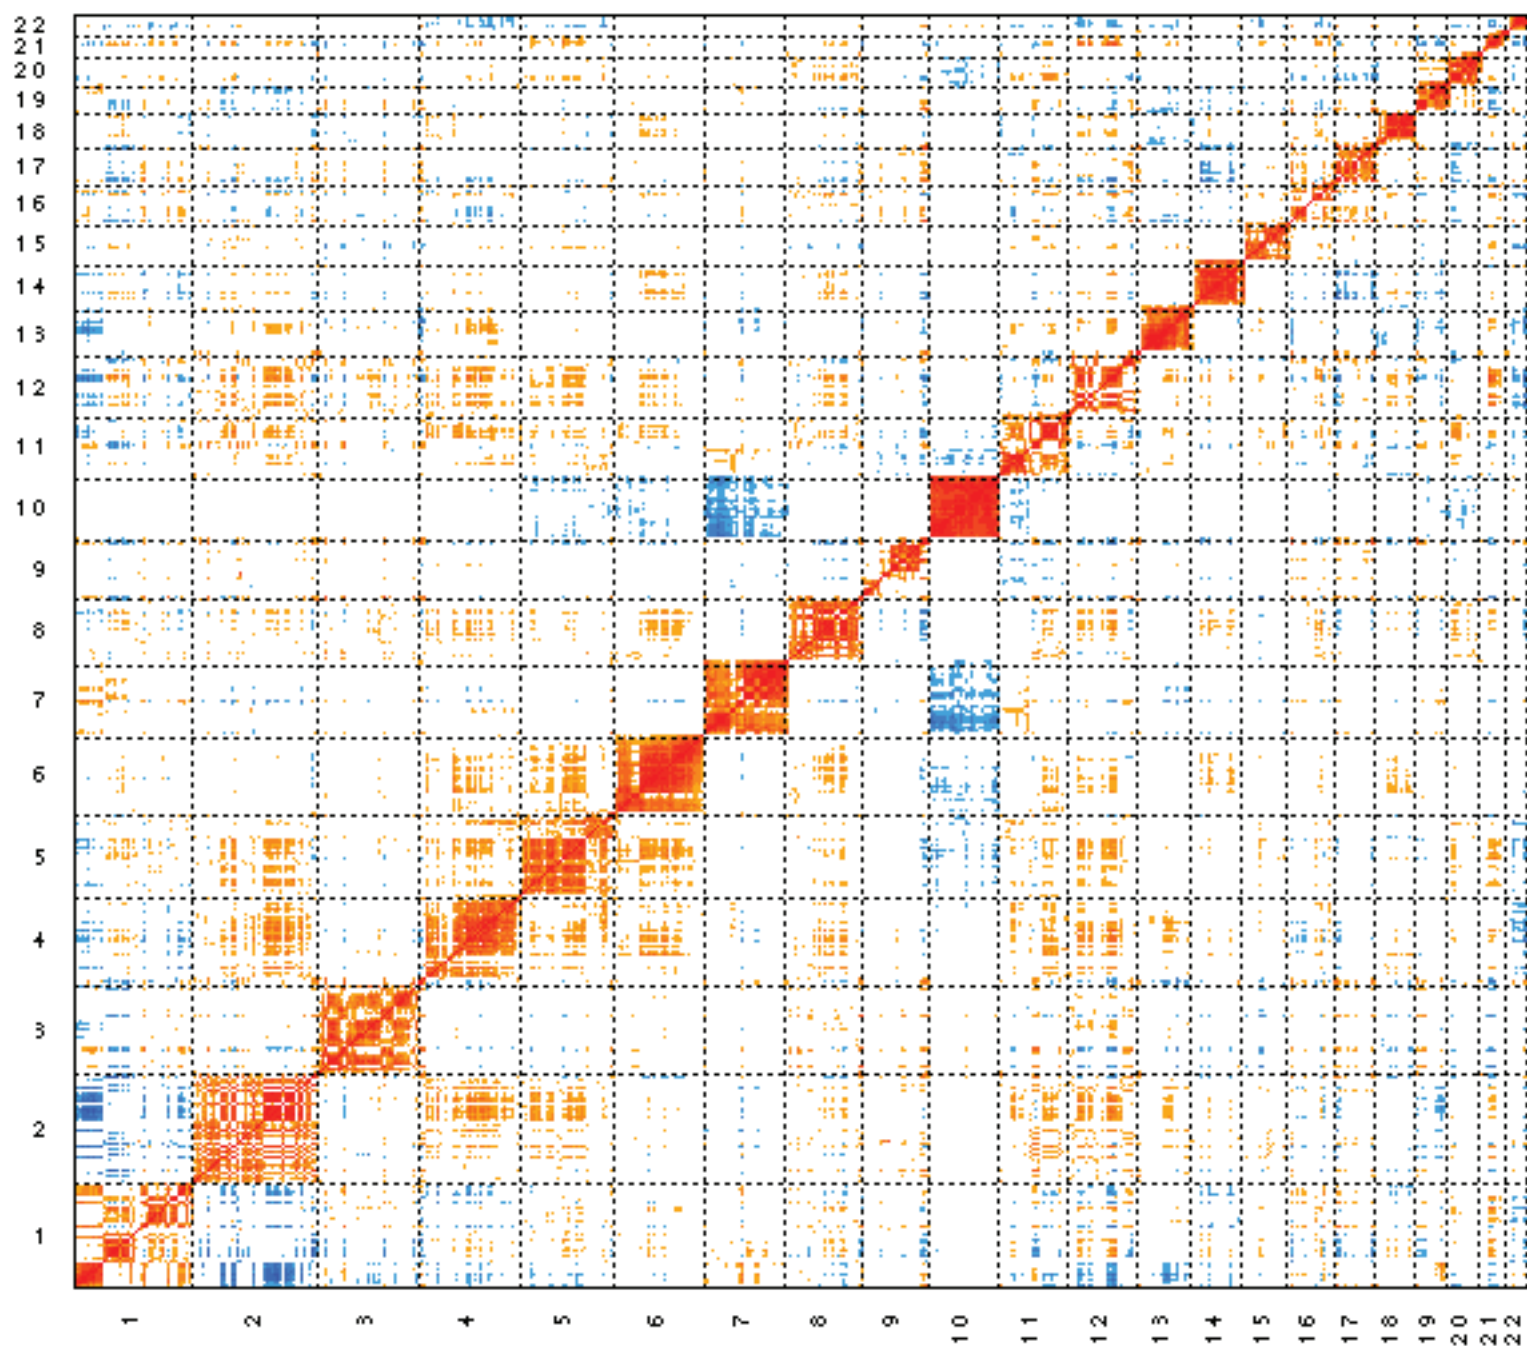

Fig. S3

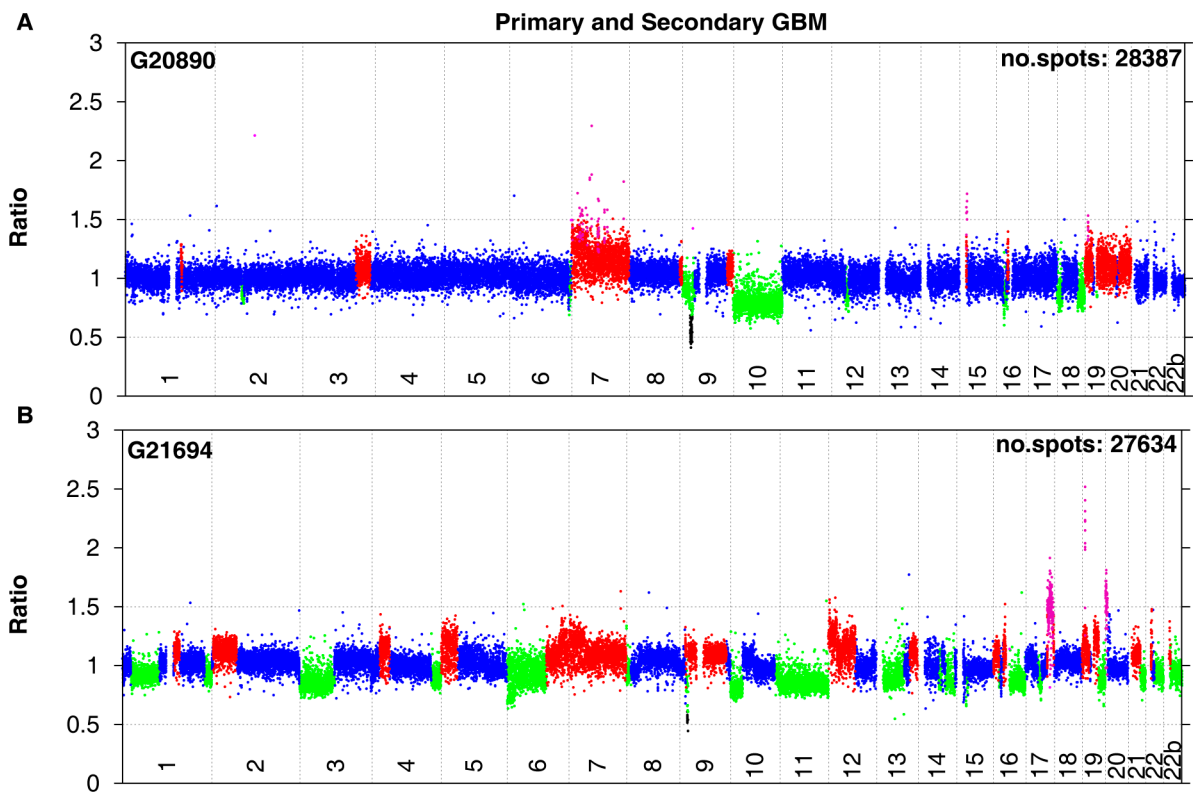

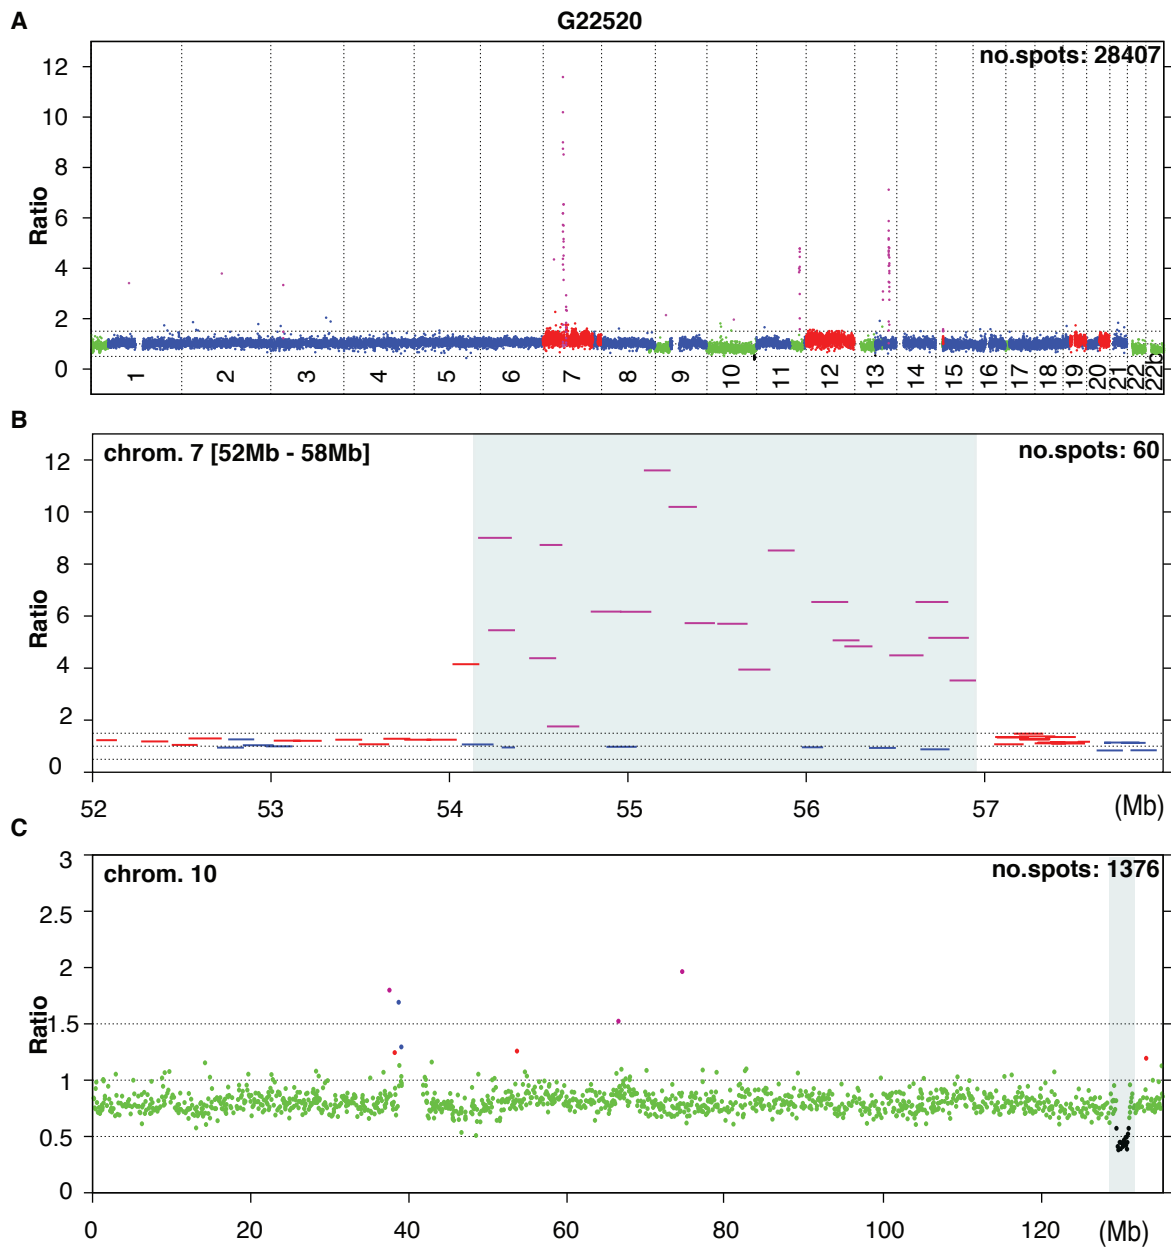

Fig. S4

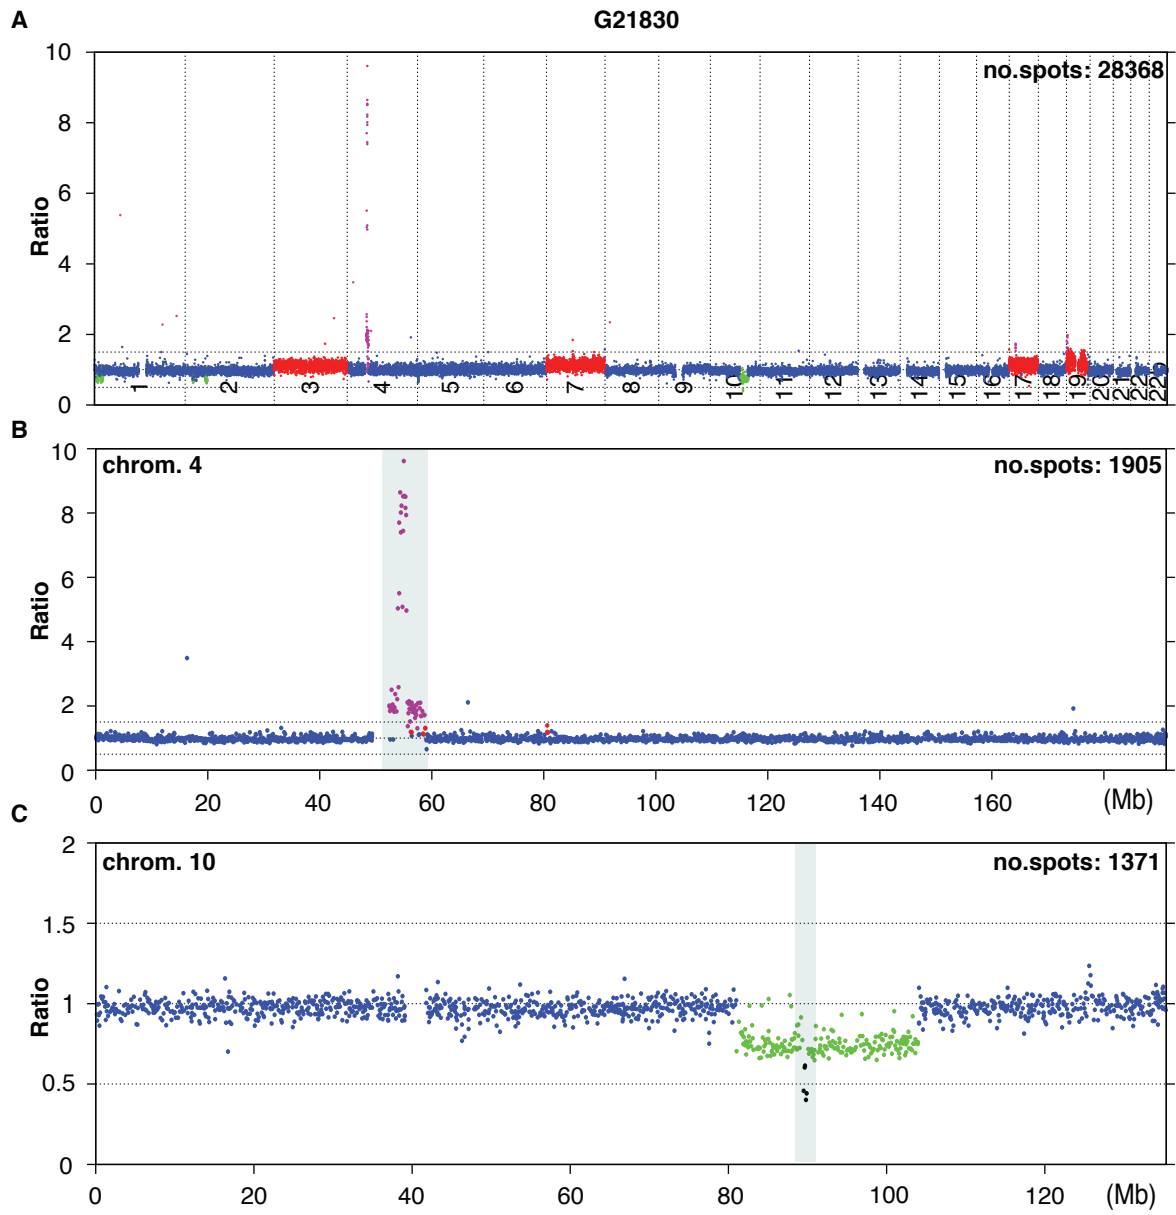

Fig. S5

Fig. S6

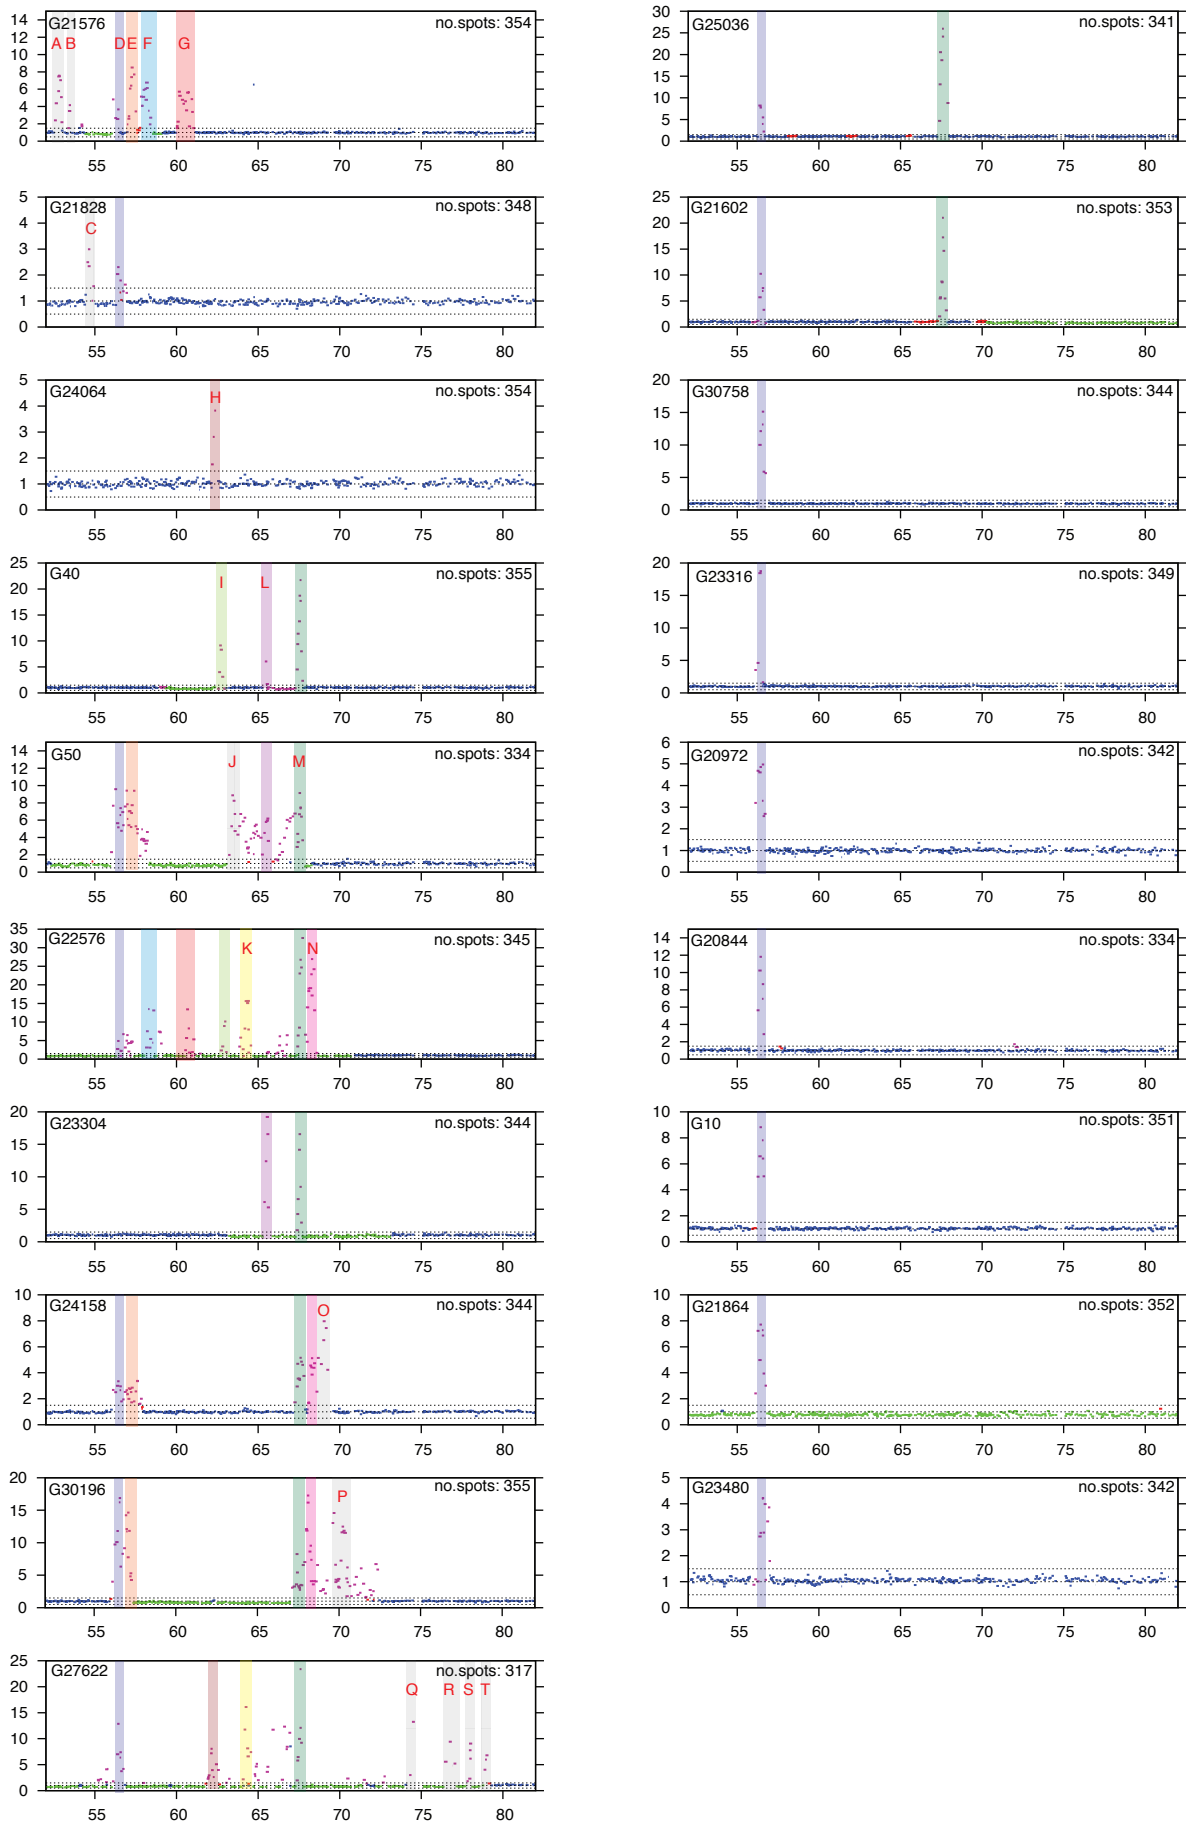

Fig. S7

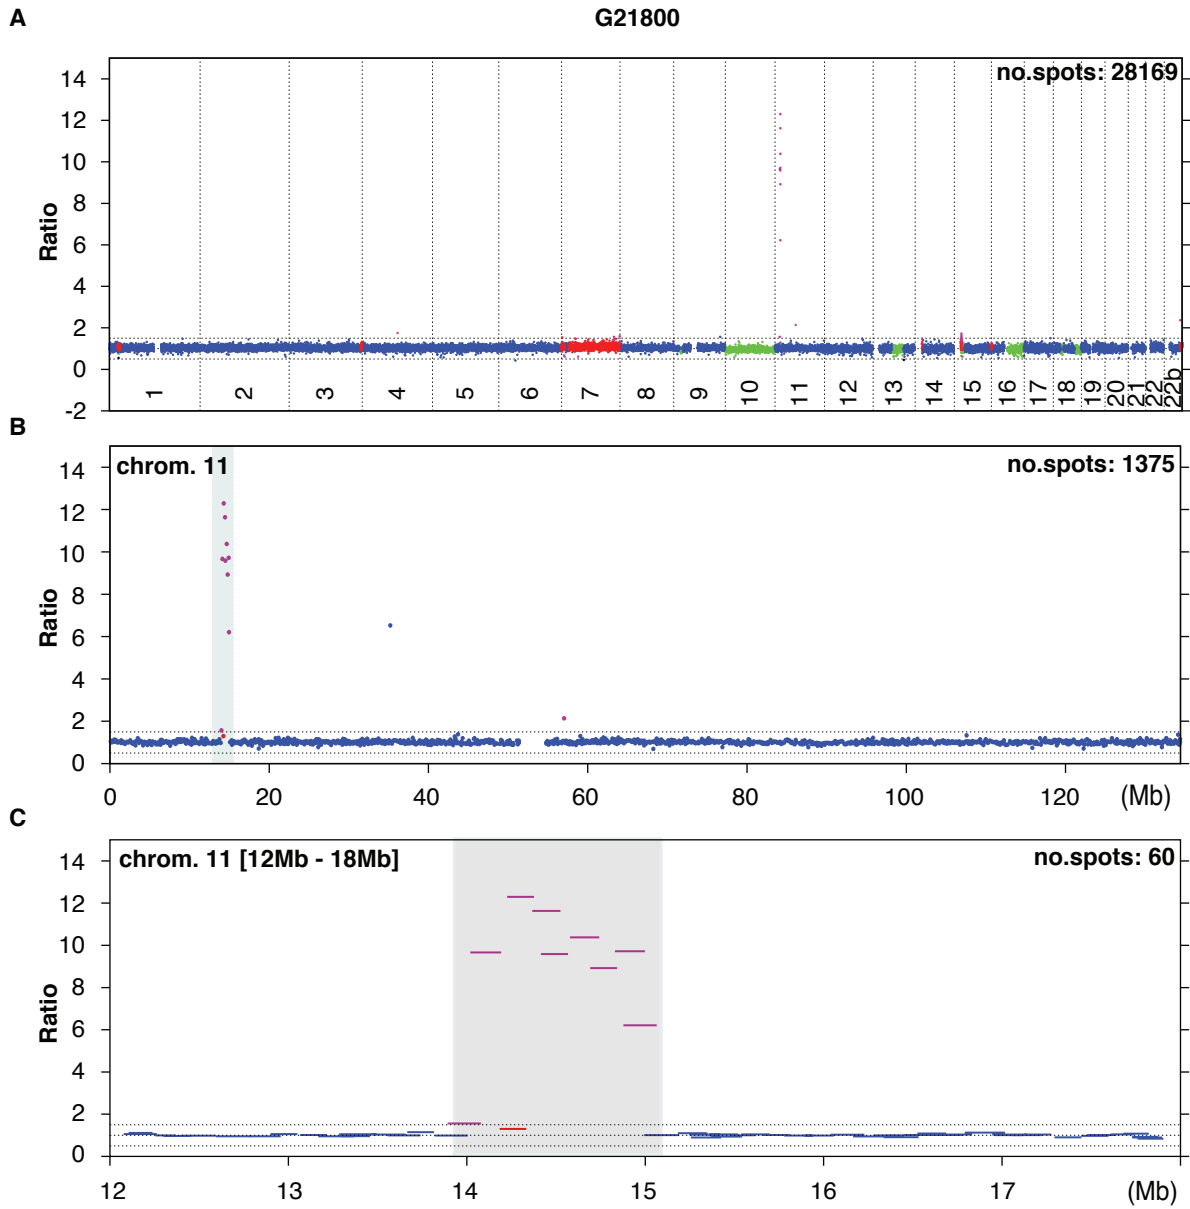

Fig. S8

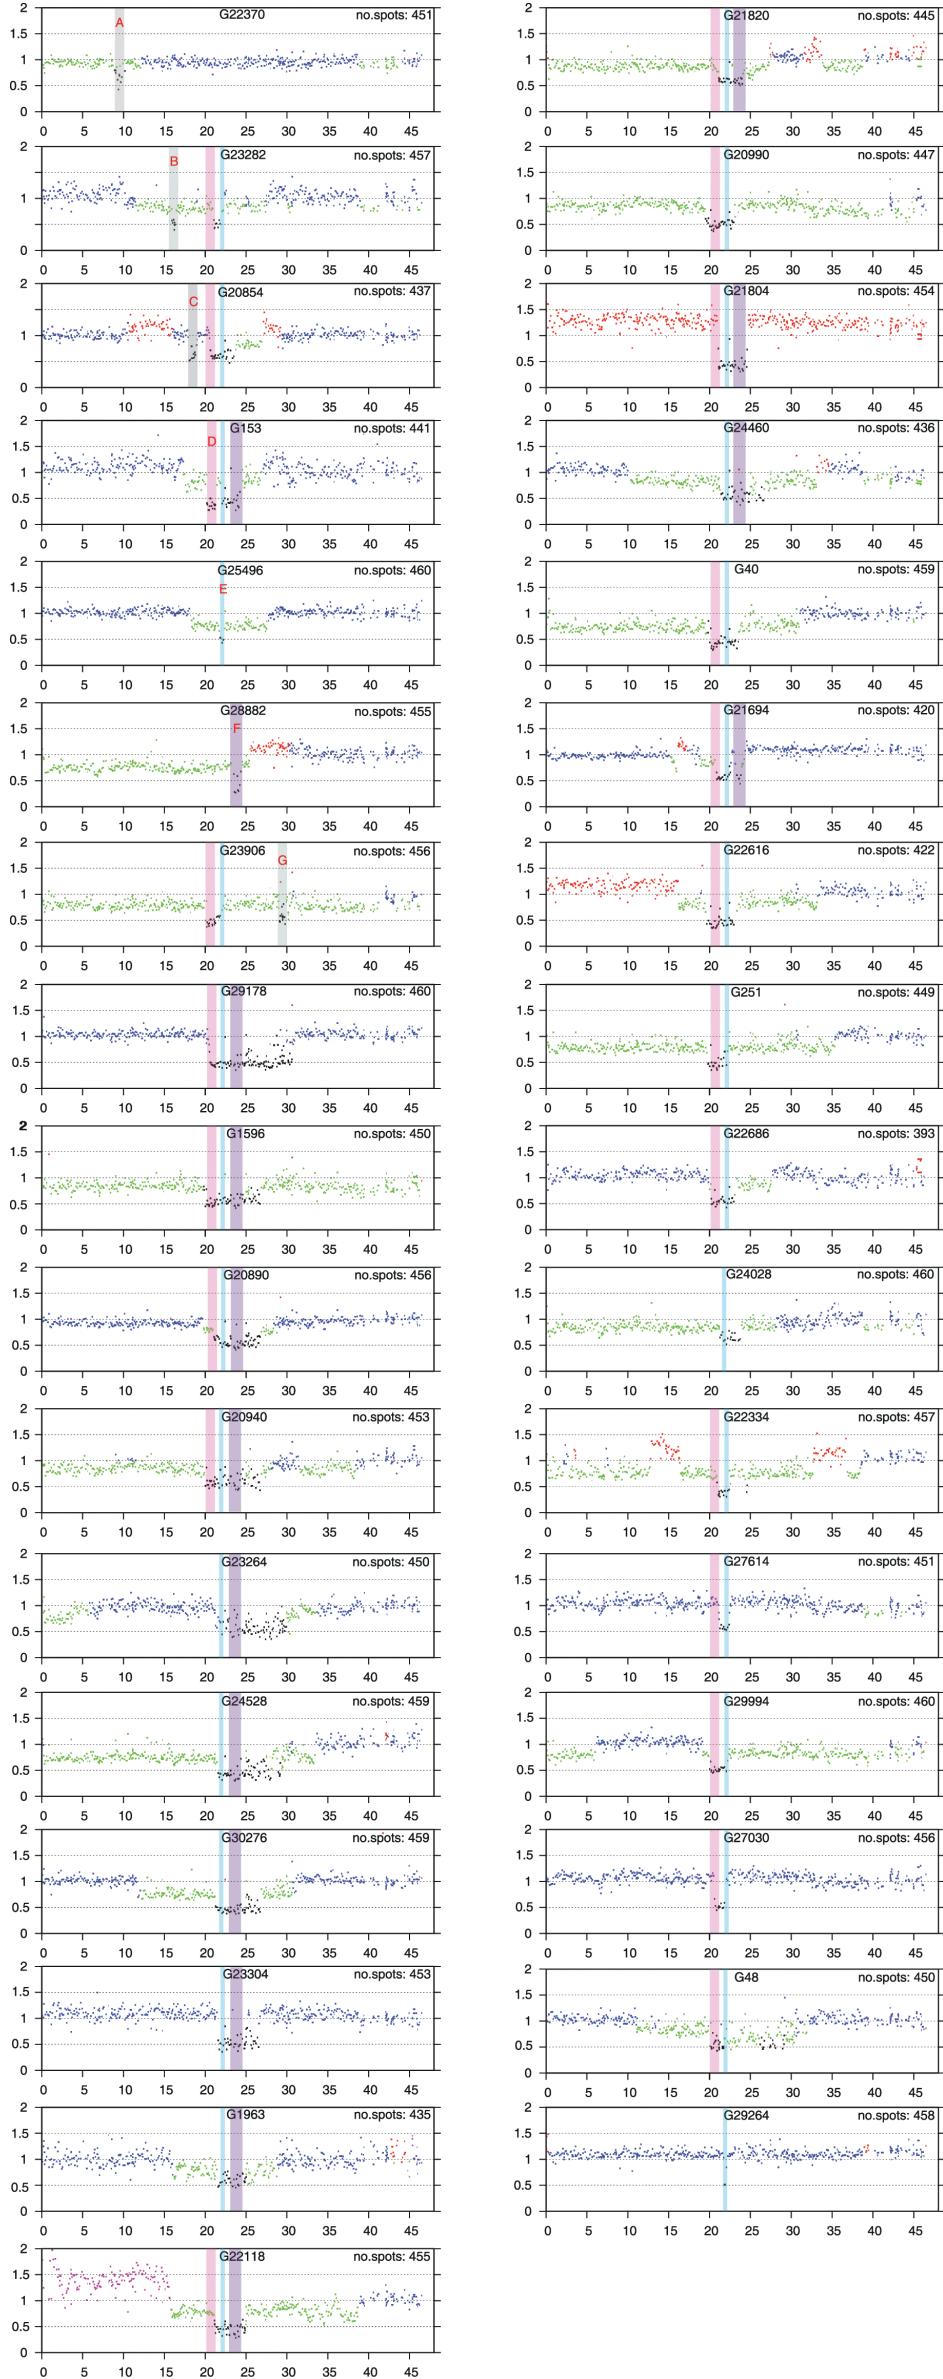

Supplement: neu-11-6-803-s001.pdf [file neu-11-6-803-s001.pdf]
